# Supplementary material for: The Health and Economic Benefits Possible with Novel Tuberculosis Vaccines – A Modeling Study in India and Indonesia
Source: Research Square preprint supplement (doi:10.21203/rs.3.rs-265017/v1), 2021-03-03
Supplement: Supplementary file 1 [file 5fc39c6582c0c7072021a83f.docx]

**The Health and Economic Benefits Possible with Novel Tuberculosis Vaccines – A Modeling Study in India and Indonesia**

**Appendix 1**

Sachin Silva1, Susanne F Awad, 2,3,4 , Laith J Abu-Raddad 2,3,4, Rifat Atun1, Eric Goosby6,7, Michael JA Reid6,7

1. Harvard TH Chan School of Public Health, Harvard University
2. Huntington Avenue, Boston, MA 02115, USA.
3. Infectious Diseases Epidemiology Group, Weill Cornell Medicine – Qatar, Cornell University

Doha, Qatar, P. O. Box 24144, Doha, Qatar

1. World Health Organization Collaborating Centre for Disease Epidemiology Analytics on HIV/AIDS, Sexually Transmitted Infections, and Viral Hepatitis, Weill Cornell Medicine – Qatar

Doha, Qatar, P. O. Box 24144, Doha, Qatar

1. Department of Population Health Sciences, Weill Cornell Medicine, Cornell University,

New York, NY 10065, USA

1. University of California, San Francisco, Institute for Global Health Sciences

550 16th Street, Third Floor, San Francisco, CA 94158, USA

1. University of California, San Francisco, School of Medicine
2. Parnassus Avenue, San Francisco, CA 94143-0410, USA

**Section A: Vaccine Impact Modelling**

The model was described by sets of coupled nonlinear ordinary differential equations (Section 1.2) and coded in MATLAB 2019a1. We stratified the population of interest (India or Indonesia) into compartments according to five-year age groups (indexed representing the 0—99 age cohort), and TB progression states of susceptible, latent TB infection, TB disease, treated TB disease, and recovered (Figure S1).

**Figure S1. A schematic diagram of the TB model.**

- 1. **TB transmission dynamics**

All individuals were born susceptible to TB (), and aged from one age group to the next age group at a transition rate . All individuals were at risk of natural mortality at a rate . TB susceptible individuals were at risk of TB infection at a rate (force of infection). A proportion and of individuals move, upon TB infection, to the stage of TB latent fast progression () and the stage of latent slow progression (), respectively. The proportion differed between children (0-14 years old) and adults (≥15 years old). Individuals in and were at risk of TB disease at a rate and , respectively. Individuals in were also at risk of reinfection (at a rate ), but due to prior TB exposure and acquired immunity there was a proportional reduction (*q*) in the susceptibility to TB infection.

TB disease individuals were characterized into the three states of smear-positive pulmonary (), smear-negative pulmonary (), and extra-pulmonary disease (). The parameter identified the fraction of individuals going into each of these disease states, and differed between children and adults (2). We considered individuals with the pulmonary TB disease types ( and ) infectious, but at varying levels. Individuals in the TB disease states could leave their state by TB-related mortality at a rate , by spontaneous natural recovery at a rate (i.e. can recover without medical treatment), or by diagnosis and effective treatment at a rate . Here, is TB treatment rate, and is the proportion of new TB disease cases that successfully completed treatment (with or without) bacteriologic evidence of success (“cured” or “treatment completed”). This proportion was derived from seven treatment outcome measures given by the World Health Organization (WHO)2:.

Treated individuals were characterized according to the three TB disease types: , , and . Individuals in the pulmonary treated states ( and ) were considered infectious, but at varying levels. Individuals in the treated states were assumed at risk of TB reinfection at a rate , TB-related mortality at a rate , spontaneous recovery at a rate , or successful treatment completion at a rate .

Individuals who are successfully treated, or those who spontaneously recover, enter the recovery stage (). Recovered TB individuals were assumed at risk of TB reinfection at a rate .

- 1. **Model structure**

TB susceptible (i.e., TB susceptible individuals):

TB latent infection:

TB disease:

Treated TB disease:

Recovered:

- 1. **Demographic parameters**

Total number of individuals in the population, , was given by:

The population growth rate () and the natural mortality rate () were described by the following functions, providing a robust fit of population growth and age structure:

and

Here the parameters , , , , , , , and were obtained by fitting the model to the demographic data from the database of the Population Division of the United Nations Department of Economic and Social Affairs3.

- 1. **TB force of infection and temporal evolution of TB contact rate**

Assuming that the mixing between individuals in the population was random, the TB force of infection () was determined by the probability of transmission per respiratory contact (), the respiratory contact rate within a population (), and the relative infectiousness of individuals with each type of TB disease (whether untreated or treated) compared to the infectiousness of individuals with smear-positive pulmonary TB ():

Given the evidence for declining TB incidence in each of India and Indonesia, a temporal change in was incorporated in the model. The temporal variation was characterized through a Wood-Saxon function4,5. This function is mathematically designed to describe and characterize transitions. It parameterizes a transition in terms of its scale or strength, smoothness or abruptness, duration, and the turning year4,5. Using the Wood-Saxon parameterization, was given by:

.

Here, is the asymptotic value that describes the contact rate well after the transition, Z is the level of change in during the transition from before the transition to after the transition, describes the transition duration parameter, and is the turning point year at which the contact rate crosses half way towards its asymptotic value of . The parameters , Z, , and were obtained by fitting the model to available empirical data on TB-incidence and mortality from the WHO’s Global Health Observatory data repository6.

- 1. **TB treatment rate and temporal evolution of TB case detection rate**

Treatment rate in the model depended on TB disease type and was determined using the case detection rates (, , and ), TB-related mortality rates (, , ), and spontaneous recovery rates (, , ):

Given the evidence for increasing TB case detection (8), temporal changes in TB case detection rates were incorporated in the model. Moreover, given the likelihood of underreporting of treatment among TB cases, TB case detection rate for each of India and Indonesia was derived by fitting the model to TB incidence and mortality rates. The temporal variation was parametrized through a logistic function:

.

Here, the parameters , , and were obtained by fitting the model to available empirical data on TB-incidence and mortality rates from the WHO’s Global Health Observatory data repository6

1. **DATA SOURCES**

The TB model for each of India and Indonesia was parameterized using empirical epidemiological and natural history data from multiple sources.

**2.1 TB epidemiological and natural history data**

The model’s parameter values for TB natural history, along with their references, are listed in Table S1.

**Table S1. Model assumptions in terms of parameter values.**

| **Symbol** | **Definition** | **Parameter value** | |
| --- | --- | --- | --- |
|  |  | **0-14 years old** | **15+ years old** |
|  | Proportion of TB infections entering latent-fast state7, 8 |  |  |
|  | Proportions of new TB disease cases in each of the three clinical disease categories9 |  |  |
|  | Fractional reduction in the susceptibility to TB reinfection due to prior exposure to TB7,10 |  | |
|  | Progression rate from latency to TB disease for latent-fast progressors (per year)7 |  | |
|  | Progression rate from latency to TB disease for latent-slow progressors (per year)7, 10 |  | |
|  | TB disease mortality rate per TB disease category for untreated and treated cases (per year)7,11 |  | |
|  | Proportion of TB disease cases that are effectively treated2 |  | |
|  | Spontaneous recovery rate (per year)7, 8, 10 | , ,  , , | |
|  | Rate of successful completion of treatment (per year)12 |  | |
|  | Transmission probability per respiratory contact7 |  | |
|  | Relative infectiousness for each of the three disease categories and treatment categories with respect to smear-positive pulmonary disease7, 13, 14 |  | |
|  | Total population3 | For each year per the database of the Population Division of the United Nations Department of Economic and Social Affairs | |
|  | Birth rate | Gaussian function | |
|  | Natural mortality rate | Combination of logistic and Gaussian functions | |
|  | Case detection rate per TB disease category | Logistic function | |
|  | Respiratory contact rate (per year) | Wood Saxon (logistic function) | |

#The three clinical categories are smear-positive pulmonary (SP), smear-negative pulmonary (SN), and extra-pulmonary (EP) tuberculosis. *X* is latent slow (LS) or latent fast (LF).

**Section B: Cause-eliminated Life Expectancy Calculation**

We first calculated the central death rate due to all causes, based on the population and deaths by age interval, as a crude rate. We then calculated the fraction of the age interval lived on average, by those who die in that interval, when all causes are operating . We then calculated the conditional probabilities of dying by all causes , the probability of survival when all causes are operating and the number of persons reaching each age who will eventually leave the lifetable , and the decrements by all causes (assuming a radix of 100,000). Lastly, we calculated the person-years lived in the age interval due to all causes and the person-years lived above the age , based on which we calculated the life expectancy when all causes are operating . To summarize:

For the last age interval, we calculated the following:

Populating from the bottom up, we set:

Then calculated:

We then extended the lifetable by first calculating the proportion of observed deaths in each age interval due to all causes but with reductions in TB deaths corresponding to the scenarios considered. We calculated the probability of survival , the number of persons reaching each age who will eventually leave the lifetable , the decrements due to reduced TB mortality , the conditional probabilities of dying , and the fraction of the age interval lived on average by those who die in that interval . Based on those parameters, we calculated the person-years lived in the age interval and the person-years lived above the age , based on which we calculated the life expectancies for the scenarios15. We calculated the difference in life expectancies between the counterfactual scenario and the vaccination scenario.

We started with a radix of 100,000 and calculated:

**Section C: Full-Income Calculation**

Following Jamison et al.16, we transformed the change in mortality risk to Standardized Mortality Units (a 1/10,000 change in mortality risk), then calculated the population value of this risk change for each country and year (), by multiplying the value by the population in each age interval ( and rescaling for the age interval using age 35 as the reference age.

To arrive at the monetary value of the risk change (), we summed the age-specific population values for each country and year and then multiplied by the value of a statistical life year (VSLY) (for the country and year), calculated as a proportion of the income per capita . We used empirically estimated country VSL values where available and calculated where not available based on benefits transfer, by adjusting the VSL in the United States (US$9,702,616) at an income of US$63,280 (in purchasing power parity adjusted international $ rates)17, assuming an income elasticity of 1.0 (1.5 considered in the sensitivity analysis). We calculated the present value of the gainsfrom the perspective of 2020, assuming a discount rate of 3% (and 5% in the sensitivity analysis). All calculations including the life table calculations and the sensitivity analysis, were performed using Stata (Stata/IC version 14.2).

**Section D: Per Capita Income Prediction**

To model per capita income from 2020 to 2050, we employed two approaches. In the first approach, we predicted future growth rates based on historical growth rates from 2000 to 2018 (available from the World Bank) using a non-parametric locally weighted smoothing regression with a bandwidth of 0.8. For this purpose, we used the Locally Weighted Scatter-plot Smoother (LOWESS) function available from Stata. We then applied the predicted growth rates recursively to each predicted value of per capita income. In the second approach, we identified a probability distribution function that best described the per capita income from 1960 to 2018, by iteratively fitting 14 distributions based on Maximum Likelihood Estimation (MLE) (using Matlab version R2017a). To determine the distribution that best described the data, we evaluated the significance level (P<0.05), the Anderson-Darling statistic, the Akaike Information Criterion (AIC), which takes into account the log likelihood18) and the likelihood ratio test result. Once we had identified the probability distribution function, to evaluate its parameter values (for example the shape and scale of a Weibull distribution), we used a least-squares minimization routine that we implemented via the Microsoft Excel Optimizer. Using the parameter values and the distribution, we predicted future per capita income through 2050. The second approach was much more resource intensive and did not provide an improvement in fit that was justifiable. We therefore relied on the fitting from the first approach.

**REFERENCES**

1. *MATLAB: The Language of Technical Computing. Getting started with MATLAB, version 7*. (MathWorks, Incorporated, 2005).

2. WHO | Global tuberculosis report 2019. *WHO* http://www.who.int/tb/publications/global_report/en/.

3. World Population Prospects - Population Division - United Nations. https://population.un.org/wpp/Download/Standard/Population/.

4. Woods, R. D. & Saxon, D. S. Diffuse Surface Optical Model for Nucleon-Nuclei Scattering. *Phys. Rev.* **95**, 577–578 (1954).

5. Velicia, F. J. F. On the moments of a Wood Saxon beta distribution. *J. Phys. A: Math. Gen.* **20**, 2293–2306 (1987).

6. GHO | By category. *WHO* https://apps.who.int/gho/data/node.main.526.

7. Abu-Raddad, L. J. *et al.* Epidemiological benefits of more-effective tuberculosis vaccines, drugs, and diagnostics. *PNAS* **106**, 13980–13985 (2009).

8. Dye, C., Garnett, G. P., Sleeman, K. & Williams, B. G. Prospects for worldwide tuberculosis control under the WHO DOTS strategy. Directly observed short-course therapy. *Lancet* **352**, 1886–1891 (1998).

9. Barnett, G. & Styblo, K. Bacteriological and X-ray status of tuberculosis following primary infection acquired during adolescence or later. *Bull Int Union Tuberc* **52**, 5–16 (1977).

10. Dye, C. & Williams, B. G. Eliminating human tuberculosis in the twenty-first century. *J R Soc Interface* **5**, 653–662 (2008).

11. Springett, V. H. Ten-year results during the introduction of chemotherapy for tuberculosis. *Tubercle* **52**, 73–87 (1971).

12. *Treatment of Tuberculosis: Guidelines*. (World Health Organization, 2010).

13. Small, P. M. *et al.* The Epidemiology of Tuberculosis in San Francisco – A Population-Based Study Using Conventional and Molecular Methods. *New England Journal of Medicine* **330**, 1703–1709 (1994).

14. Chang, J.-T. *et al.* Effect of type 2 diabetes mellitus on the clinical severity and treatment outcome in patients with pulmonary tuberculosis: a potential role in the emergence of multidrug-resistance. *J. Formos. Med. Assoc.* **110**, 372–381 (2011).

15. Preston, S., Heuveline, P. & Guillot, M. *Demography: Measuring and Modeling Population Processes*. (Wiley-Blackwell, 2000).

16. Jamison, D. T. *et al.* Global health 2035: a world converging within a generation. *The Lancet* **382**, 1898–1955 (2013).

17. US EPA, O. Guidelines for Preparing Economic Analyses. *US EPA* https://www.epa.gov/environmental-economics/guidelines-preparing-economic-analyses (2014).

18. Akaike, H. A new look at the statistical model identification. *IEEE Transactions on Automatic Control* **19**, 716–723 (1974).
