# Supplementary material for: The Health and Economic Benefits Possible with Novel Tuberculosis Vaccines – A Modeling Study in India and Indonesia
Source: Research Square preprint supplement (doi:10.21203/rs.3.rs-265017/v1), 2021-03-03
Supplement: Supplementary file 2 [file c6b2f6ee7043a766d2a40a06.xlsx]

## Sheet: Sheet1
The Health and Economic Benefits Possible with Novel Tuberculosis Vaccines – A Modeling Study in India and Indonesia
Appendix 3
SILVA, Sachin1, AWAD, Susanne F2,3,4 , ABU-RADDAD Laith J2,3,4, ATUN, Rifat1, GOOSBY, Eric6,7, REID, Michael J6,7
1. Harvard TH Chan School of Public Health, Harvard University
677 Huntington Avenue, Boston, MA 02115, USA.
2. Infectious Diseases Epidemiology Group, Weill Cornell Medicine – Qatar, Cornell University
Doha, Qatar, P. O. Box 24144, Doha, Qatar
3. World Health Organization Collaborating Centre for Disease Epidemiology Analytics on HIV/AIDS, Sexually Transmitted Infections, and Viral Hepatitis, Weill Cornell Medicine – Qatar
Doha, Qatar, P. O. Box 24144, Doha, Qatar
4. Department of Population Health Sciences, Weill Cornell Medicine, Cornell University,
New York, NY 10065, USA
5. University of California, San Francisco, Institute for Global Health Sciences
550 16th Street, Third Floor, San Francisco, CA 94158, USA
6. University of California, San Francisco, School of Medicine
513 Parnassus Avenue, San Francisco, CA 94143-0410, USA

## Sheet: Scenarios Considered
	Scenario	Efficacy	Immunity	Age Group	Scale-up
	1	54.1 (90% CI: 20.3%-73.6%)	Lifelong	All ages	2030
	2	54.1 (90% CI: 20.3%-73.6%)	Lifelong	All ages	2025
	3	54.1 (90% CI: 20.3%-73.6%)	Lifelong	All ages	2020
	4	54.1 (90% CI: 20.3%-73.6%)	Lifelong	18-49	2030
	5	54.1 (90% CI: 20.3%-73.6%)	Lifelong	18-49	2025
	6	54.1 (90% CI: 20.3%-73.6%)	Lifelong	18-49	2020
	7	49.7 (90% CI: 12.1%-71.2%)	Lifelong	18-49	2019
	8	49.7 (90% CI: 12.1%-71.2%)	10 years	18-49
	9	54.1 (90% CI: 20.3%-73.6%)	Lifelong	18-49
	10	54.1 (90% CI: 20.3%-73.6%)	10 years	18-49
	11	49.7 (90% CI: 12.1%-71.2%)	Lifelong	All ages	2019
	12	49.7 (90% CI: 12.1%-71.2%)	10 year	All ages
	13	54.1 (90% CI: 20.3%-73.6%)	Lifelong	All ages
	14	54.1 (90% CI: 20.3%-73.6%)	10 year	All ages

## Sheet: India Mortality Averted
Year	Scenario 1	Scenario 2	Scenario 3	Scenario 4	Scenario 5	Scenario 6	Scenario 7	Scenario 8	Scenario 9	Scenario 10	Scenario 11	Scenario 12	Scenario 13	Scenario 14
2020	0	0	4344	0	0	3750	3446	3334	3750	3628	3992	3860	4344	4200
2021	0	0	13104	0	0	10782	9917	9305	10782	10116	12060	11288	13104	12266
2022	0	0	23523	0	0	18598	17121	15638	18598	16986	21669	19696	23523	21376
2023	0	0	34560	0	0	26486	24404	21776	26486	23633	31878	28237	34560	30609
2024	0	0	45568	0	0	34088	31433	27478	34088	29797	42084	36403	45568	39420
2025	0	3	56119	0	3	41206	38026	32632	41206	35367	51872	43939	56119	47538
2026	0	4224	65960	0	3574	47754	44103	37214	47754	40298	61006	50720	65960	54835
2027	0	12609	74957	0	10171	53732	49648	41238	53732	44634	69371	56721	74957	61284
2028	0	22546	83063	0	17484	59157	54684	44749	59157	48414	76917	61961	83063	66909
2029	0	33062	90289	0	24853	64071	59249	47799	64071	51696	83651	66496	90289	71772
2030	3	43595	96684	3	31978	68526	63392	50438	68526	54533	89617	70398	96684	75954
2031	4102	53765	102062	3379	38710	72517	67121	52724	72517	56989	94673	73752	102062	79546
2032	12199	63353	106540	9584	44970	76118	70478	54705	76118	59115	98872	76641	106540	82637
2033	21817	72232	110342	16477	50756	79414	73555	56428	79414	60961	102448	79137	110342	85305
2034	32049	80357	113607	23463	56085	82471	76405	57932	82471	62571	105505	81309	113607	87625
2035	42364	87732	116434	30268	60994	85328	79072	59249	85328	63980	108159	83214	116434	89657
2036	52412	94167	118919	36748	65461	88027	81592	60408	88027	65219	110485	84902	118919	91455
2037	61968	99643	121127	42842	69550	90598	83993	61434	90598	66314	112552	86414	121127	93065
2038	70911	104415	123118	48533	73342	93065	86299	62346	93065	67287	114418	87786	123118	94523
2039	79183	108604	124939	53829	76885	95450	88529	63162	95450	68156	116119	89046	124939	95861
2040	86776	112319	126627	58766	80220	97766	90697	63896	97766	68936	117698	90218	126627	97104
2041	93457	115637	128213	63312	83383	100028	92815	64559	100028	69639	119180	91322	128213	98273
2042	99251	118630	129717	67523	86400	102245	94892	65160	102245	70275	120585	92372	129717	99386
2043	104375	121359	131159	71465	89296	104423	96935	65708	104423	70854	121934	93382	131159	100453
2044	108937	123864	132555	75182	92089	106571	98949	66209	106571	71381	123236	94360	132555	101487
2045	113032	126187	133911	78703	94794	108690	100937	66667	108690	71863	124504	95314	133911	102495
2046	116730	128359	135239	82063	97423	110784	102903	67087	110784	72304	125744	96250	135239	103484
2047	120092	130402	136543	85281	99987	112855	104847	67474	112855	72707	126961	97172	136543	104456
2048	123177	132340	137826	88377	102492	114902	106771	67828	114902	73076	128160	98082	137826	105417
2049	126022	134185	139093	91369	104944	116928	108674	68152	116928	73413	129341	98982	139093	106367
2050	128661	135949	140341	94266	107347	118929	110556	68448	118929	73719	130506	99874	140341	107307

## Sheet: Indonesia Mortality Averted
Year	Scenario 1	Scenario 2	Scenario 3	Scenario 4	Scenario 5	Scenario 6	Scenario 7	Scenario 8	Scenario 9	Scenario 10	Scenario 11	Scenario 12	Scenario 13	Scenario 14
2020	0	0	1037	0	0	739	679	656	739	714	953	921	1037	1002
2021	0	0	3091	0	0	2074	1907	1788	2074	1944	2844	2660	3091	2891
2022	0	0	5649	0	0	3612	3324	3036	3612	3298	5205	4731	5649	5134
2023	0	0	8528	0	0	5248	4836	4318	5248	4686	7869	6973	8528	7557
2024	0	0	11590	0	0	6923	6386	5590	6923	6061	10710	9279	11590	10042
2025	0	0	14724	0	0	8591	7932	6821	8591	7388	13622	11567	14724	12503
2026	0	1083	17838	0	737	10222	9445	7989	10222	8648	16520	13777	17838	14877
2027	0	3213	20863	0	2063	11793	10904	9082	11793	9824	19338	15867	20863	17120
2028	0	5853	23748	0	3582	13291	12297	10089	13291	10908	22028	17811	23748	19205
2029	0	8808	26457	0	5188	14707	13614	11009	14707	11897	24556	19595	26457	21117
2030	0	11935	28969	0	6820	16038	14851	11838	16038	12788	26901	21212	28969	22849
2031	1113	15116	31201	726	8435	17265	15993	12577	17265	13583	28987	22661	31201	24401
2032	3292	18257	33146	2026	10002	18392	17043	13229	18392	14283	30804	23946	33146	25777
2033	5978	21286	34842	3507	11502	19431	18010	13796	19431	14893	32388	25072	34842	26984
2034	8970	24153	36307	5064	12921	20386	18899	14281	20386	15414	33755	26048	36307	28030
2035	12120	26823	37559	6637	14254	21262	19716	14689	21262	15852	34922	26882	37559	28925
2036	15306	29192	38617	8184	15480	22066	20464	15022	22066	16211	35905	27584	38617	29679
2037	18433	31254	39496	9676	16604	22800	21148	15287	22800	16495	36720	28163	39496	30302
2038	21428	33048	40213	11095	17635	23471	21772	15486	23471	16709	37382	28629	40213	30804
2039	24243	34596	40783	12429	18578	24081	22340	15624	24081	16858	37906	28991	40783	31195
2040	26843	35917	41219	13672	19441	24635	22855	15706	24635	16946	38303	29258	41219	31485
2041	29132	37029	41534	14810	20226	25137	23322	15736	25137	16979	38587	29438	41534	31682
2042	31102	37951	41740	15844	20941	25591	23743	15718	25591	16959	38768	29539	41740	31795
2043	32796	38701	41846	16786	21589	25998	24122	15657	25998	16893	38856	29569	41846	31832
2044	34239	39295	41864	17642	22174	26363	24461	15555	26363	16784	38861	29535	41864	31800
2045	35451	39747	41802	18419	22703	26688	24762	15418	26688	16636	38791	29444	41802	31707
2046	36453	40073	41668	19121	23177	26975	25029	15248	26975	16454	38654	29302	41668	31559
2047	37265	40283	41471	19754	23602	27228	25263	15050	27228	16240	38457	29115	41471	31363
2048	37906	40391	41216	20323	23981	27447	25466	14826	27447	15999	38208	28888	41216	31123
2049	38394	40407	40910	20833	24317	27636	25640	14581	27636	15735	37912	28626	40910	30846
2050	38743	40340	40560	21288	24613	27795	25787	14316	27795	15449	37575	28333	40560	30536

## Sheet: India Incidence Averted
Year	Scenario 1	Scenario 2	Scenario 3	Scenario 4	Scenario 5	Scenario 6	Scenario 7	Scenario 8	Scenario 9	Scenario 10	Scenario 11	Scenario 12	Scenario 13	Scenario 14
2020	0	0	90958	0	0	77049	70827.2	67423.5	77049	73346.1	83633.6	79571.8	90958	86540.1
2021	0	0	199720	0	0	163325	150304	137230	163325	149119	183908	167563	199720	181972
2022	0	0	304169	0	0	240855	221915	195912	240855	212645	280497	246588	304169	267395
2023	0	0	396875	0	0	306025	282293	242650	306025	263083	366574	313050	396875	338969
2024	0	0	476492	0	0	359911	332367	279640	359911	302884	440795	367585	476492	397492
2025	0	14.7299	543917	1.00117e-08	14.7298	404641	374062	309213	404641	334646	503840	412117	543917	445131
2026	0	83678.7	600788	0	69306.5	442254	409232	333234	442254	360323	557158	448563	600788	484015
2027	0	180875	648785	0	144218	474478	439391	353017	474478	381473	602298	478569	648785	515952
2028	0	275493	689414	0	212568	502540	465690	369523	502540	399093	640603	503408	689414	542341
2029	0	361510	723952	0	271659	527360	488982	383431	527360	413930	673234	524095	723952	564286
2030	13.695	437546	753277	13.6946	322167	549617	509915	395225	549617	426496	701203	541444	753277	582673
2031	79221.1	503953	774327	63828.9	365614	568781	528062	405310	568781	437235	721446	556133	774327	598226
2032	170316	561765	791780	131891	403405	586320	544572	413981	586320	446451	738060	568700	791780	611524
2033	260070	612105	806655	194802	436778	602666	559972	421489	602666	454424	752239	579581	806655	623029
2034	343120	656067	819638	250323	466656	618155	574535	428030	618155	461360	764524	589126	819638	633116
2035	417938	694697	831168	298860	493686	632953	588465	433757	632953	467433	775448	597620	831168	642088
2036	484584	724343	841623	341497	517492	647231	601901	438808	647231	472779	785299	605289	841623	650184
2037	543674	749333	851228	379374	539465	661096	614951	443284	661096	477514	794340	612317	851228	657600
2038	596067	771196	860203	413419	560037	674630	627698	447275	674630	481730	802785	618853	860203	664494
2039	642601	790600	868704	444368	579495	687920	640207	450851	687920	485501	810748	625016	868704	670992
2040	684076	808099	876846	472777	598047	700992	652528	454075	700992	488896	818380	630901	876846	677195
2041	716521	824030	884739	498217	615853	713906	664697	456992	713906	491957	825762	636581	884739	683180
2042	744736	838686	892436	521933	633034	726690	676743	459639	726690	494730	832956	642116	892436	689011
2043	769781	852326	900002	544291	649689	739349	688684	462051	739349	497252	840029	647550	900002	694734
2044	792279	865095	907483	565554	665896	751917	700532	464254	751917	499544	847006	652914	907483	700383
2045	812728	877155	914887	585882	681714	764389	712297	466265	764389	501632	853917	658236	914887	705986
2046	831459	888625	922251	605441	697191	776769	723978	468104	776769	503535	860783	663528	922251	711559
2047	848735	899584	929573	624319	712367	789066	735574	469785	789066	505264	867608	668804	929573	717114
2048	864818	910123	936856	642604	727267	801260	747083	471313	801260	506832	874397	674067	936856	722656
2049	879847	920281	944110	660380	741914	813355	758494	472702	813355	508248	881147	679317	944110	728185
2050	893974	930103	951302	677679	756314	825330	769794	473950	825330	509510	887845	684548	951302	733696

## Sheet: Indonesia Incidence Averted
Year	Scenario 1	Scenario 2	Scenario 3	Scenario 4	Scenario 5	Scenario 6	Scenario 7	Scenario 8	Scenario 9	Scenario 10	Scenario 11	Scenario 12	Scenario 13	Scenario 14
2020	0	0	33873.9	0	0	24320.4	22350.9	21192.8	24320.4	23060.2	31137.5	29516.5	33873.9	32110.4
2021	0	0	81365.2	0	0	56096.2	51592.6	46688.7	56096.2	50764.5	74879.2	67676.6	81365.2	73539.3
2022	0	0	129337	0	0	85862.2	79044.4	68874.3	85862.2	74817.7	119202	103569	129337	112381
2023	0	0	173034	0	0	111286	102557	86710.3	111286	94099.9	159735	134422	173034	145638
2024	0	0	211224	0	0	132497	122235	100902	132497	109394	195317	160222	211224	173328
2025	0	0.00172673	244030	0	0.00172679	150263	138769	112354	150263	121697	226029	181700	244030	196279
2026	0	33767.5	272026	0	23075.7	165358	152862	121779	165358	131794	252362	199649	272026	215383
2027	0	80308	295868	0	52641.3	178402	165071	129667	178402	140224	274889	214738	295868	231385
2028	0	127253	316162	0	80320.1	189842	175806	136337	189842	147337	294144	227483	316162	244859
2029	0	170047	333423	0	104023	199995	185351	141997	199995	153363	310584	238269	333423	256234
2030	0.000812718	207465	348079	0.000812552	123855	209079	193903	146784	209079	158451	324595	247388	348079	265832
2031	33505.7	239590	358649	21856.8	140494	216805	201194	150793	216805	162706	334814	255064	358649	273895
2032	79016.7	266948	366802	49405.8	158850	223620	207635	154095	223620	166205	342699	261468	366802	280614
2033	124824	290156	373245	75162.3	166827	229747	213432	156746	229747	169009	348937	266742	373245	286139
2034	166558	309794	378335	97244.5	177482	235293	218684	158795	235293	171170	353869	271000	378335	290594
2035	203018	326358	382275	115742	186885	240316	223445	160284	240316	172733	357689	274341	382275	294084
2036	234263	338170	385201	131265	194814	244852	227748	161252	244852	173741	360527	276851	385201	296700
2037	260787	347237	387214	144440	201748	248930	231620	161736	248930	174234	362482	278606	387214	298524
2038	283182	354375	388398	155770	207924	252576	235085	161774	252576	174250	363636	279675	388398	299626
2039	302010	359999	388830	165628	213462	255812	238164	161398	255812	173826	364062	280120	388830	300074
2040	317766	364347	388577	174280	218429	258661	240878	160642	258661	172996	363828	280001	388577	299928
2041	328878	367577	387701	181534	222871	261143	243248	159538	261143	171795	362994	279370	387701	299243
2042	337264	369808	386260	187835	226826	263280	245291	158118	263280	170256	361617	278276	386260	298071
2043	343718	371139	384307	193398	230325	265089	247027	156410	265089	168411	359749	276767	384307	296461
2044	348649	371658	381891	198337	233396	266590	248471	154444	266590	166289	357437	274885	381891	294456
2045	352295	371443	379058	202717	236068	267800	249641	152247	267800	163920	354728	272669	379058	292100
2046	354823	370567	375849	206589	238367	268733	250551	149846	268733	161332	351663	270158	375849	289430
2047	356357	369096	372305	209991	240315	269405	251214	147264	269405	158551	348279	267386	372305	286482
2048	357006	367088	368462	212956	241936	269828	251643	144526	269828	155601	344614	264384	368462	283291
2049	356862	364600	364354	215517	243250	270017	251850	141653	270017	152508	340699	261183	364354	279886
2050	356010	360011	361682	217703	244278	269980	251845	138667	269980	149292	336566	257810	361682	276297
