# Supplementary material for: The Health and Economic Benefits Possible with Novel Tuberculosis Vaccines – A Modeling Study in India and Indonesia
Source: Research Square preprint supplement (doi:10.21203/rs.3.rs-265017/v1), 2021-03-03
Supplement: Supplementary file 3 [file d1834ea6fb444f6d3e575595.docx]

**The Health and Economic Benefits Possible with Novel Tuberculosis Vaccines – A Modeling Study in India and Indonesia**

**Appendix 2**

Sachin Silva1, Susanne F Awad, 2,3,4 , Laith J Abu-Raddad 2,3,4, Rifat Atun1, Eric Goosby6,7, Michael JA Reid6,7

1. Harvard TH Chan School of Public Health, Harvard University
2. Huntington Avenue, Boston, MA 02115, USA.
3. Infectious Diseases Epidemiology Group, Weill Cornell Medicine – Qatar, Cornell University

Doha, Qatar, P. O. Box 24144, Doha, Qatar

1. World Health Organization Collaborating Centre for Disease Epidemiology Analytics on HIV/AIDS, Sexually Transmitted Infections, and Viral Hepatitis, Weill Cornell Medicine – Qatar

Doha, Qatar, P. O. Box 24144, Doha, Qatar

1. Department of Population Health Sciences, Weill Cornell Medicine, Cornell University,

New York, NY 10065, USA

1. University of California, San Francisco, Institute for Global Health Sciences

550 16th Street, Third Floor, San Francisco, CA 94158, USA

1. University of California, San Francisco, School of Medicine
2. Parnassus Avenue, San Francisco, CA 94143-0410, USA

**Section 1: Health and Economic Benefits in India**


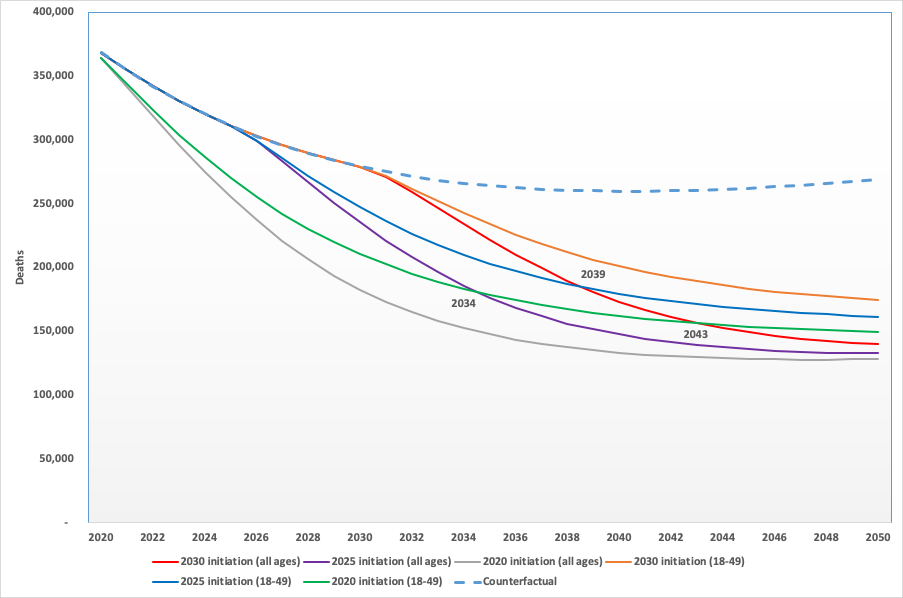


**Appendix Figure 1:** Impact of vaccination initiation and vaccinated age group, on TB mortality in India between 2020 and 2050. Impact shown for vaccination initiation in 2020, 2025 and 2030, to individuals of all ages or individuals between the ages of 18-49 years, with a vaccine that provides 54.1% efficacy and lifetime protection.

**Counterfactual scenario**

| Country Name | Year | TB Deaths | Mean LE at Birth | Full-income Loss |
| --- | --- | --- | --- | --- |
| India | 2020 | 368294 | 0.670 | 186058522624 |
| India | 2021 | 354630 | 0.641 | 189507944448 |
| India | 2022 | 342110 | 0.616 | 193360969728 |
| India | 2023 | 330753 | 0.595 | 197702189056 |
| India | 2024 | 320504 | 0.573 | 202584440832 |
| India | 2025 | 311314 | 0.555 | 208072441856 |
| India | 2026 | 303123 | 0.539 | 214274359296 |
| India | 2027 | 295872 | 0.527 | 221196107776 |
| India | 2028 | 289507 | 0.514 | 228886315008 |
| India | 2029 | 283950 | 0.504 | 237388087296 |
| India | 2030 | 279132 | 0.496 | 246739501056 |
| India | 2031 | 274992 | 0.489 | 257082458112 |
| India | 2032 | 271475 | 0.483 | 268387516416 |
| India | 2033 | 268525 | 0.478 | 280735285248 |
| India | 2034 | 266097 | 0.475 | 294167642112 |
| India | 2035 | 264133 | 0.473 | 308740685824 |
| India | 2036 | 262591 | 0.472 | 324587323392 |
| India | 2037 | 261437 | 0.471 | 341727739904 |
| India | 2038 | 260631 | 0.473 | 360234745856 |
| India | 2039 | 260136 | 0.473 | 380185477120 |
| India | 2040 | 259924 | 0.474 | 401666703360 |
| India | 2041 | 259975 | 0.478 | 424836825088 |
| India | 2042 | 260262 | 0.481 | 449728544768 |
| India | 2043 | 260759 | 0.484 | 476440526848 |
| India | 2044 | 261448 | 0.488 | 505079627776 |
| India | 2045 | 262315 | 0.491 | 535816372224 |
| India | 2046 | 263343 | 0.498 | 568892129280 |
| India | 2047 | 264509 | 0.503 | 604322398208 |
| India | 2048 | 265810 | 0.508 | 642247753728 |
| India | 2049 | 267229 | 0.513 | 682805166080 |
| India | 2050 | 268759 | 0.520 | 725707980800 |

**Vaccination initiated in 2030 to all ages (54.1% efficacy with lifelong protection)**

| Country Name | Year | TB Deaths | Mean LE at Birth | Full-income Loss |
| --- | --- | --- | --- | --- |
| India | 2020 | 368294 | 0.670 | 186058522624 |
| India | 2021 | 354630 | 0.641 | 189507944448 |
| India | 2022 | 342110 | 0.616 | 193360969728 |
| India | 2023 | 330753 | 0.595 | 197702189056 |
| India | 2024 | 320504 | 0.573 | 202584440832 |
| India | 2025 | 311314 | 0.555 | 208072441856 |
| India | 2026 | 303123 | 0.539 | 214274359296 |
| India | 2027 | 295872 | 0.527 | 221196107776 |
| India | 2028 | 289507 | 0.514 | 228886315008 |
| India | 2029 | 283950 | 0.504 | 237388087296 |
| India | 2030 | 279127 | 0.496 | 246736535552 |
| India | 2031 | 270889 | 0.482 | 253242621952 |
| India | 2032 | 259280 | 0.461 | 256333152256 |
| India | 2033 | 246713 | 0.439 | 257930739712 |
| India | 2034 | 234047 | 0.417 | 258734850048 |
| India | 2035 | 221771 | 0.397 | 259223437312 |
| India | 2036 | 210177 | 0.377 | 259804397568 |
| India | 2037 | 199468 | 0.359 | 260729536512 |
| India | 2038 | 189718 | 0.344 | 262225641472 |
| India | 2039 | 180952 | 0.328 | 264465350656 |
| India | 2040 | 173147 | 0.316 | 267575590912 |
| India | 2041 | 166523 | 0.306 | 272121413632 |
| India | 2042 | 161011 | 0.297 | 278228402176 |
| India | 2043 | 156383 | 0.290 | 285744300032 |
| India | 2044 | 152514 | 0.284 | 294638813184 |
| India | 2045 | 149287 | 0.279 | 304957882368 |
| India | 2046 | 146610 | 0.277 | 316725198848 |
| India | 2047 | 144419 | 0.274 | 329964158976 |
| India | 2048 | 142635 | 0.272 | 344640192512 |
| India | 2049 | 141213 | 0.270 | 360833941504 |
| India | 2050 | 140098 | 0.270 | 378318258176 |

**Vaccination initiated in 2025 to all ages (54.1% efficacy with lifelong protection)**

| Country Name | Year | TB Deaths | Mean LE at Birth | Full-income Loss |
| --- | --- | --- | --- | --- |
| India | 2020 | 368294 | 0.670 | 186058522624 |
| India | 2021 | 354630 | 0.641 | 189507944448 |
| India | 2022 | 342110 | 0.616 | 193360969728 |
| India | 2023 | 330753 | 0.595 | 197702189056 |
| India | 2024 | 320504 | 0.573 | 202584440832 |
| India | 2025 | 311310 | 0.555 | 208070082560 |
| India | 2026 | 298894 | 0.532 | 211289636864 |
| India | 2027 | 283262 | 0.505 | 211767410688 |
| India | 2028 | 266961 | 0.473 | 211064700928 |
| India | 2029 | 250884 | 0.445 | 209748213760 |
| India | 2030 | 235537 | 0.419 | 208207200256 |
| India | 2031 | 221225 | 0.393 | 206820278272 |
| India | 2032 | 208126 | 0.370 | 205763018752 |
| India | 2033 | 196298 | 0.349 | 205223657472 |
| India | 2034 | 185740 | 0.331 | 205340540928 |
| India | 2035 | 176400 | 0.315 | 206188691456 |
| India | 2036 | 168423 | 0.302 | 208195338240 |
| India | 2037 | 161797 | 0.291 | 211488735232 |
| India | 2038 | 156213 | 0.283 | 215922491392 |
| India | 2039 | 151531 | 0.275 | 221467000832 |
| India | 2040 | 147609 | 0.269 | 228114530304 |
| India | 2041 | 144339 | 0.265 | 235867881472 |
| India | 2042 | 141630 | 0.261 | 244740227072 |
| India | 2043 | 139401 | 0.258 | 254716346368 |
| India | 2044 | 137589 | 0.257 | 265804857344 |
| India | 2045 | 136125 | 0.254 | 278078291968 |
| India | 2046 | 134982 | 0.255 | 291610099712 |
| India | 2047 | 134106 | 0.254 | 306411208704 |
| India | 2048 | 133473 | 0.254 | 322510716928 |
| India | 2049 | 133048 | 0.255 | 339969277952 |
| India | 2050 | 132812 | 0.256 | 358650904576 |

**Vaccination initiated in 2020 to all ages (54.1% efficacy with lifelong protection)**

| Country Name | Year | TB Deaths | Mean LE at Birth | Full-income Loss |
| --- | --- | --- | --- | --- |
| India | 2020 | 363951 | 0.662 | 183861821440 |
| India | 2021 | 341523 | 0.618 | 182505635840 |
| India | 2022 | 318591 | 0.574 | 180066844672 |
| India | 2023 | 296191 | 0.533 | 177043603456 |
| India | 2024 | 274935 | 0.491 | 173782237184 |
| India | 2025 | 255193 | 0.454 | 170563715072 |
| India | 2026 | 237160 | 0.421 | 167647363072 |
| India | 2027 | 220915 | 0.393 | 165159469056 |
| India | 2028 | 206444 | 0.365 | 163219259392 |
| India | 2029 | 193659 | 0.343 | 161906147328 |
| India | 2030 | 182445 | 0.324 | 161280327680 |
| India | 2031 | 172933 | 0.307 | 161672806400 |
| India | 2032 | 164935 | 0.292 | 163064299520 |
| India | 2033 | 158185 | 0.281 | 165377458176 |
| India | 2034 | 152493 | 0.271 | 168583004160 |
| India | 2035 | 147698 | 0.264 | 172643057664 |
| India | 2036 | 143676 | 0.257 | 177598578688 |
| India | 2037 | 140312 | 0.252 | 183408279552 |
| India | 2038 | 137512 | 0.249 | 190069276672 |
| India | 2039 | 135197 | 0.245 | 197597446144 |
| India | 2040 | 133299 | 0.243 | 205998473216 |
| India | 2041 | 131763 | 0.242 | 215332454400 |
| India | 2042 | 130545 | 0.241 | 225580564480 |
| India | 2043 | 129602 | 0.240 | 236806799360 |
| India | 2044 | 128896 | 0.240 | 249013714944 |
| India | 2045 | 128404 | 0.240 | 262301827072 |
| India | 2046 | 128102 | 0.242 | 276748828672 |
| India | 2047 | 127970 | 0.243 | 292378247168 |
| India | 2048 | 127987 | 0.244 | 309252227072 |
| India | 2049 | 128142 | 0.245 | 327426342912 |
| India | 2050 | 128420 | 0.248 | 346788560896 |

**Vaccination initiated in 2030 to ages 18-49 (54.1% efficacy with lifelong protection)**

| Country Name | Year | TB Deaths | Mean LE at Birth | Full-income Loss |
| --- | --- | --- | --- | --- |
| India | 2020 | 368294 | 0.670 | 186058522624 |
| India | 2021 | 354630 | 0.641 | 189507944448 |
| India | 2022 | 342110 | 0.616 | 193360969728 |
| India | 2023 | 330753 | 0.595 | 197702189056 |
| India | 2024 | 320504 | 0.573 | 202584440832 |
| India | 2025 | 311314 | 0.555 | 208072441856 |
| India | 2026 | 303123 | 0.539 | 214274359296 |
| India | 2027 | 295872 | 0.527 | 221196107776 |
| India | 2028 | 289507 | 0.514 | 228886315008 |
| India | 2029 | 283950 | 0.504 | 237388087296 |
| India | 2030 | 279128 | 0.496 | 246736535552 |
| India | 2031 | 271613 | 0.483 | 253921509376 |
| India | 2032 | 261888 | 0.466 | 258912829440 |
| India | 2033 | 252056 | 0.449 | 263514783744 |
| India | 2034 | 242633 | 0.433 | 268227198976 |
| India | 2035 | 233865 | 0.418 | 273355259904 |
| India | 2036 | 225846 | 0.405 | 279165829120 |
| India | 2037 | 218595 | 0.394 | 285732503552 |
| India | 2038 | 212095 | 0.385 | 293156257792 |
| India | 2039 | 206306 | 0.375 | 301524058112 |
| India | 2040 | 201162 | 0.367 | 310860283904 |
| India | 2041 | 196665 | 0.361 | 321383301120 |
| India | 2042 | 192739 | 0.356 | 333050937344 |
| India | 2043 | 189295 | 0.351 | 345866567680 |
| India | 2044 | 186270 | 0.347 | 359857061888 |
| India | 2045 | 183612 | 0.343 | 375071768576 |
| India | 2046 | 181279 | 0.342 | 391619608576 |
| India | 2047 | 179230 | 0.340 | 409498550272 |
| India | 2048 | 177437 | 0.338 | 428731400192 |
| India | 2049 | 175861 | 0.337 | 449360887808 |
| India | 2050 | 174495 | 0.337 | 471196401664 |

**Vaccination initiated in 2025 to ages 18-49 (54.1% efficacy with lifelong protection)**

| Country Name | Year | TB Deaths | Mean LE at Birth | Full-income Loss |
| --- | --- | --- | --- | --- |
| India | 2020 | 368294 | 0.670 | 186058522624 |
| India | 2021 | 354630 | 0.641 | 189507944448 |
| India | 2022 | 342110 | 0.616 | 193360969728 |
| India | 2023 | 330753 | 0.595 | 197702189056 |
| India | 2024 | 320504 | 0.573 | 202584440832 |
| India | 2025 | 311310 | 0.555 | 208070082560 |
| India | 2026 | 299545 | 0.533 | 211747307520 |
| India | 2027 | 285707 | 0.509 | 213590081536 |
| India | 2028 | 272028 | 0.482 | 215067557888 |
| India | 2029 | 259097 | 0.460 | 216610406400 |
| India | 2030 | 247155 | 0.439 | 218478018560 |
| India | 2031 | 236280 | 0.420 | 220892102656 |
| India | 2032 | 226503 | 0.402 | 223931547648 |
| India | 2033 | 217772 | 0.387 | 227676700672 |
| India | 2034 | 210011 | 0.374 | 232164622336 |
| India | 2035 | 203137 | 0.363 | 237444988928 |
| India | 2036 | 197137 | 0.354 | 243678527488 |
| India | 2037 | 191887 | 0.345 | 250826620928 |
| India | 2038 | 187287 | 0.340 | 258864513024 |
| India | 2039 | 183248 | 0.333 | 267823841280 |
| India | 2040 | 179702 | 0.328 | 277705916416 |
| India | 2041 | 176596 | 0.324 | 288589676544 |
| India | 2042 | 173861 | 0.321 | 300427444224 |
| India | 2043 | 171461 | 0.318 | 313285869568 |
| India | 2044 | 169360 | 0.316 | 327189233664 |
| India | 2045 | 167518 | 0.313 | 342201237504 |
| India | 2046 | 165917 | 0.313 | 358440304640 |
| India | 2047 | 164526 | 0.312 | 375891656704 |
| India | 2048 | 163323 | 0.311 | 394621419520 |
| India | 2049 | 162290 | 0.311 | 414691622912 |
| India | 2050 | 161411 | 0.312 | 435864567808 |

**Vaccination initiated in 2020 to ages 18-49 (54.1% efficacy with lifelong protection)**

| Country Name | Year | TB Deaths | Mean LE at Birth | Full-income Loss |
| --- | --- | --- | --- | --- |
| India | 2020 | 364544 | 0.663 | 184164745216 |
| India | 2021 | 343843 | 0.622 | 183745921024 |
| India | 2022 | 323512 | 0.583 | 182851829760 |
| India | 2023 | 304266 | 0.547 | 181870018560 |
| India | 2024 | 286417 | 0.512 | 181043806208 |
| India | 2025 | 270106 | 0.481 | 180531445760 |
| India | 2026 | 255365 | 0.454 | 180516995072 |
| India | 2027 | 242141 | 0.431 | 181026160640 |
| India | 2028 | 230349 | 0.408 | 182119006208 |
| India | 2029 | 219871 | 0.390 | 183819976704 |
| India | 2030 | 210604 | 0.374 | 186170261504 |
| India | 2031 | 202476 | 0.359 | 189295001600 |
| India | 2032 | 195353 | 0.347 | 193135755264 |
| India | 2033 | 189110 | 0.336 | 197713821696 |
| India | 2034 | 183627 | 0.327 | 202999644160 |
| India | 2035 | 178806 | 0.320 | 209001824256 |
| India | 2036 | 174567 | 0.313 | 215784374272 |
| India | 2037 | 170838 | 0.307 | 223312150528 |
| India | 2038 | 167564 | 0.304 | 231604895744 |
| India | 2039 | 164685 | 0.299 | 240692838400 |
| India | 2040 | 162158 | 0.296 | 250589528064 |
| India | 2041 | 159952 | 0.293 | 261384945664 |
| India | 2042 | 158013 | 0.291 | 273059938304 |
| India | 2043 | 156337 | 0.290 | 285653368832 |
| India | 2044 | 154877 | 0.289 | 299208736768 |
| India | 2045 | 153630 | 0.287 | 313827688448 |
| India | 2046 | 152555 | 0.288 | 329575333888 |
| India | 2047 | 151655 | 0.288 | 346501578752 |
| India | 2048 | 150912 | 0.288 | 364636995584 |
| India | 2049 | 150305 | 0.288 | 384064454656 |
| India | 2050 | 149829 | 0.289 | 404594229248 |

**Vaccination initiated in 2020 to ages 18-49 (49.7% efficacy with lifelong protection)**

| Country Name | Year | TB Deaths | Mean LE at Birth | Full-income Loss |
| --- | --- | --- | --- | --- |
| India | 2020 | 364845 | 0.664 | 184314937344 |
| India | 2021 | 344712 | 0.623 | 184212488192 |
| India | 2022 | 324993 | 0.585 | 183685038080 |
| India | 2023 | 306343 | 0.551 | 183110893568 |
| India | 2024 | 289073 | 0.516 | 182718447616 |
| India | 2025 | 273288 | 0.487 | 182657187840 |
| India | 2026 | 259019 | 0.460 | 183096131584 |
| India | 2027 | 246227 | 0.438 | 184082546688 |
| India | 2028 | 234823 | 0.416 | 185653641216 |
| India | 2029 | 224697 | 0.398 | 187856322560 |
| India | 2030 | 215739 | 0.383 | 190708908032 |
| India | 2031 | 207869 | 0.369 | 194338717696 |
| India | 2032 | 201000 | 0.357 | 198714146816 |
| India | 2033 | 194973 | 0.347 | 203841191936 |
| India | 2034 | 189694 | 0.338 | 209704927232 |
| India | 2035 | 185061 | 0.331 | 216315527168 |
| India | 2036 | 181000 | 0.324 | 223738019840 |
| India | 2037 | 177444 | 0.319 | 231941488640 |
| India | 2038 | 174329 | 0.316 | 240958373888 |
| India | 2039 | 171607 | 0.311 | 250804961280 |
| India | 2040 | 169228 | 0.309 | 261523800064 |
| India | 2041 | 167165 | 0.307 | 273173020672 |
| India | 2042 | 165367 | 0.305 | 285751705600 |
| India | 2043 | 163824 | 0.304 | 299334500352 |
| India | 2044 | 162497 | 0.303 | 313932578816 |
| India | 2045 | 161375 | 0.301 | 329660137472 |
| India | 2046 | 160438 | 0.303 | 346591264768 |
| India | 2047 | 159662 | 0.303 | 364788973568 |
| India | 2048 | 159040 | 0.303 | 384280166400 |
| India | 2049 | 158557 | 0.304 | 405146206208 |
| India | 2050 | 158207 | 0.305 | 427214831616 |

**Vaccination initiated in 2020 to ages 18-49 (54.1% efficacy with 10 years of protection)**

| Country Name | Year | TB Deaths | Mean LE at Birth | Full-income Loss |
| --- | --- | --- | --- | --- |
| India | 2020 | 364954 | 0.664 | 184371593216 |
| India | 2021 | 345320 | 0.624 | 184536743936 |
| India | 2022 | 326476 | 0.588 | 184526274560 |
| India | 2023 | 308975 | 0.556 | 184685150208 |
| India | 2024 | 293028 | 0.524 | 185218465792 |
| India | 2025 | 278681 | 0.496 | 186259390464 |
| India | 2026 | 265911 | 0.473 | 187970682880 |
| India | 2027 | 254634 | 0.453 | 190365270016 |
| India | 2028 | 244759 | 0.434 | 193507606528 |
| India | 2029 | 236149 | 0.419 | 197429100544 |
| India | 2030 | 228688 | 0.406 | 202157228032 |
| India | 2031 | 222268 | 0.395 | 207796387840 |
| India | 2032 | 216773 | 0.385 | 214307422208 |
| India | 2033 | 212099 | 0.377 | 221745922048 |
| India | 2034 | 208165 | 0.371 | 230127206400 |
| India | 2035 | 204884 | 0.366 | 239485009920 |
| India | 2036 | 202188 | 0.363 | 249923616768 |
| India | 2037 | 200001 | 0.360 | 261426315264 |
| India | 2038 | 198283 | 0.360 | 274062196736 |
| India | 2039 | 196978 | 0.358 | 287887982592 |
| India | 2040 | 196028 | 0.358 | 302930329600 |
| India | 2041 | 195417 | 0.359 | 319341527040 |
| India | 2042 | 195102 | 0.360 | 337136287744 |
| India | 2043 | 195053 | 0.362 | 356389224448 |
| India | 2044 | 195242 | 0.364 | 377184616448 |
| India | 2045 | 195648 | 0.366 | 399646457856 |
| India | 2046 | 196254 | 0.370 | 423965065216 |
| India | 2047 | 197037 | 0.374 | 450176253952 |
| India | 2048 | 197983 | 0.378 | 478373740544 |
| India | 2049 | 199082 | 0.382 | 508689907712 |
| India | 2050 | 200310 | 0.387 | 540903473152 |

**Vaccination initiated in 2020 to ages 18-49 (54.1% efficacy with lifelong protection)**

| Country Name | Year | TB Deaths | Mean LE at Birth | Full-income Loss |
| --- | --- | --- | --- | --- |
| India | 2020 | 364544 | 0.663 | 184164745216 |
| India | 2021 | 343843 | 0.622 | 183745921024 |
| India | 2022 | 323512 | 0.583 | 182851829760 |
| India | 2023 | 304266 | 0.547 | 181870018560 |
| India | 2024 | 286417 | 0.512 | 181043806208 |
| India | 2025 | 270106 | 0.481 | 180531445760 |
| India | 2026 | 255365 | 0.454 | 180516995072 |
| India | 2027 | 242141 | 0.431 | 181026160640 |
| India | 2028 | 230349 | 0.408 | 182119006208 |
| India | 2029 | 219871 | 0.390 | 183819976704 |
| India | 2030 | 210604 | 0.374 | 186170261504 |
| India | 2031 | 202476 | 0.359 | 189295001600 |
| India | 2032 | 195353 | 0.347 | 193135755264 |
| India | 2033 | 189110 | 0.336 | 197713821696 |
| India | 2034 | 183627 | 0.327 | 202999644160 |
| India | 2035 | 178806 | 0.320 | 209001824256 |
| India | 2036 | 174567 | 0.313 | 215784374272 |
| India | 2037 | 170838 | 0.307 | 223312150528 |
| India | 2038 | 167564 | 0.304 | 231604895744 |
| India | 2039 | 164685 | 0.299 | 240692838400 |
| India | 2040 | 162158 | 0.296 | 250589528064 |
| India | 2041 | 159952 | 0.293 | 261384945664 |
| India | 2042 | 158013 | 0.291 | 273059938304 |
| India | 2043 | 156337 | 0.290 | 285653368832 |
| India | 2044 | 154877 | 0.289 | 299208736768 |
| India | 2045 | 153630 | 0.287 | 313827688448 |
| India | 2046 | 152555 | 0.288 | 329575333888 |
| India | 2047 | 151655 | 0.288 | 346501578752 |
| India | 2048 | 150912 | 0.288 | 364636995584 |
| India | 2049 | 150305 | 0.288 | 384064454656 |
| India | 2050 | 149829 | 0.289 | 404594229248 |

**Vaccination initiated in 2020 to ages 18-49 (54.1% efficacy with 10 years of protection)**

| Country Name | Year | TB Deaths | Mean LE at Birth | Full-income Loss |
| --- | --- | --- | --- | --- |
| India | 2020 | 364665 | 0.663 | 184221696000 |
| India | 2021 | 344508 | 0.623 | 184102354944 |
| India | 2022 | 325122 | 0.586 | 183762927616 |
| India | 2023 | 307122 | 0.553 | 183577001984 |
| India | 2024 | 290709 | 0.519 | 183752704000 |
| India | 2025 | 275947 | 0.491 | 184433311744 |
| India | 2026 | 262823 | 0.467 | 185791348736 |
| India | 2027 | 251242 | 0.447 | 187829321728 |
| India | 2028 | 241095 | 0.427 | 190615683072 |
| India | 2029 | 232252 | 0.412 | 194167717888 |
| India | 2030 | 224595 | 0.399 | 198536871936 |
| India | 2031 | 218000 | 0.387 | 203807113216 |
| India | 2032 | 212366 | 0.377 | 209953259520 |
| India | 2033 | 207570 | 0.369 | 217007603712 |
| India | 2034 | 203526 | 0.363 | 224996065280 |
| India | 2035 | 200149 | 0.358 | 233949462528 |
| India | 2036 | 197379 | 0.354 | 243980091392 |
| India | 2037 | 195121 | 0.351 | 255051857920 |
| India | 2038 | 193339 | 0.351 | 267227267072 |
| India | 2039 | 191979 | 0.348 | 280579375104 |
| India | 2040 | 190992 | 0.348 | 295149404160 |
| India | 2041 | 190337 | 0.349 | 311044767744 |
| India | 2042 | 189981 | 0.351 | 328286502912 |
| India | 2043 | 189901 | 0.352 | 346979827712 |
| India | 2044 | 190069 | 0.355 | 367197487104 |
| India | 2045 | 190453 | 0.356 | 389050925056 |
| India | 2046 | 191034 | 0.361 | 412695298048 |
| India | 2047 | 191803 | 0.364 | 438211477504 |
| India | 2048 | 192735 | 0.368 | 465683546112 |
| India | 2049 | 193820 | 0.372 | 495252439040 |
| India | 2050 | 195037 | 0.377 | 526674395136 |

**Vaccination initiated in 2020 to all ages (49.7% efficacy with lifelong protection)**

| Country Name | Year | TB Deaths | Mean LE at Birth | Full-income Loss |
| --- | --- | --- | --- | --- |
| India | 2020 | 364298 | 0.663 | 184037834752 |
| India | 2021 | 342566 | 0.619 | 183062757376 |
| India | 2022 | 320444 | 0.577 | 181114847232 |
| India | 2023 | 298874 | 0.538 | 178647285760 |
| India | 2024 | 278422 | 0.497 | 175985704960 |
| India | 2025 | 259442 | 0.462 | 173402767360 |
| India | 2026 | 242115 | 0.430 | 171150573568 |
| India | 2027 | 226503 | 0.403 | 169336815616 |
| India | 2028 | 212587 | 0.376 | 168076312576 |
| India | 2029 | 200295 | 0.355 | 167456489472 |
| India | 2030 | 189511 | 0.337 | 167526891520 |
| India | 2031 | 180317 | 0.320 | 168577024000 |
| India | 2032 | 172600 | 0.306 | 170643472384 |
| India | 2033 | 166079 | 0.295 | 173637386240 |
| India | 2034 | 160594 | 0.286 | 177541529600 |
| India | 2035 | 155973 | 0.279 | 182320136192 |
| India | 2036 | 152111 | 0.272 | 188026372096 |
| India | 2037 | 148886 | 0.268 | 194615132160 |
| India | 2038 | 146209 | 0.265 | 202092068864 |
| India | 2039 | 144016 | 0.261 | 210482364416 |
| India | 2040 | 142231 | 0.259 | 219797110784 |
| India | 2041 | 140801 | 0.258 | 230097305600 |
| India | 2042 | 139679 | 0.257 | 241364500480 |
| India | 2043 | 138825 | 0.257 | 253657350144 |
| India | 2044 | 138209 | 0.258 | 267011325952 |
| India | 2045 | 137810 | 0.257 | 281517260800 |
| India | 2046 | 137600 | 0.260 | 297267855360 |
| India | 2047 | 137550 | 0.261 | 314272546816 |
| India | 2048 | 137652 | 0.262 | 332615876608 |
| India | 2049 | 137889 | 0.264 | 352348241920 |
| India | 2050 | 138256 | 0.267 | 373342437376 |

**Vaccination initiated in 2020 to all ages (49.7% efficacy with 10 years of protection)**

| Country Name | Year | TB Deaths | Mean LE at Birth | Full-income Loss |
| --- | --- | --- | --- | --- |
| India | 2020 | 364434 | 0.663 | 184106352640 |
| India | 2021 | 343341 | 0.621 | 183477338112 |
| India | 2022 | 322418 | 0.581 | 182230368256 |
| India | 2023 | 302515 | 0.544 | 180823310336 |
| India | 2024 | 284105 | 0.507 | 179578159104 |
| India | 2025 | 267373 | 0.476 | 178703745024 |
| India | 2026 | 252399 | 0.449 | 178421137408 |
| India | 2027 | 239153 | 0.426 | 178791530496 |
| India | 2028 | 227546 | 0.403 | 179900907520 |
| India | 2029 | 217452 | 0.385 | 181797011456 |
| India | 2030 | 208728 | 0.371 | 184513216512 |
| India | 2031 | 201240 | 0.357 | 188136423424 |
| India | 2032 | 194836 | 0.346 | 192623984640 |
| India | 2033 | 189393 | 0.337 | 198007930880 |
| India | 2034 | 184795 | 0.329 | 204285640704 |
| India | 2035 | 180916 | 0.323 | 211469516800 |
| India | 2036 | 177692 | 0.319 | 219651522560 |
| India | 2037 | 175025 | 0.315 | 228777508864 |
| India | 2038 | 172838 | 0.313 | 238896250880 |
| India | 2039 | 171089 | 0.310 | 250046169088 |
| India | 2040 | 169705 | 0.309 | 262257360896 |
| India | 2041 | 168654 | 0.309 | 275612565504 |
| India | 2042 | 167891 | 0.310 | 290113028096 |
| India | 2043 | 167377 | 0.310 | 305826791424 |
| India | 2044 | 167094 | 0.312 | 322808905728 |
| India | 2045 | 167007 | 0.312 | 341149220864 |
| India | 2046 | 167094 | 0.315 | 360971698176 |
| India | 2047 | 167340 | 0.318 | 382325325824 |
| India | 2048 | 167732 | 0.320 | 405267611648 |
| India | 2049 | 168250 | 0.322 | 429920059392 |
| India | 2050 | 168886 | 0.326 | 456044216320 |

**Vaccination initiated in 2020 to all ages (54.1% efficacy with lifelong protection)**

| Country Name | Year | TB Deaths | Mean LE at Birth | Full-income Loss |
| --- | --- | --- | --- | --- |
| India | 2020 | 363951 | 0.662 | 183861821440 |
| India | 2021 | 341523 | 0.618 | 182505635840 |
| India | 2022 | 318591 | 0.574 | 180066844672 |
| India | 2023 | 296191 | 0.533 | 177043603456 |
| India | 2024 | 274935 | 0.491 | 173782237184 |
| India | 2025 | 255193 | 0.454 | 170563715072 |
| India | 2026 | 237160 | 0.421 | 167647363072 |
| India | 2027 | 220915 | 0.393 | 165159469056 |
| India | 2028 | 206444 | 0.365 | 163219259392 |
| India | 2029 | 193659 | 0.343 | 161906147328 |
| India | 2030 | 182445 | 0.324 | 161280327680 |
| India | 2031 | 172933 | 0.307 | 161672806400 |
| India | 2032 | 164935 | 0.292 | 163064299520 |
| India | 2033 | 158187 | 0.281 | 165381865472 |
| India | 2034 | 152493 | 0.271 | 168583004160 |
| India | 2035 | 147698 | 0.264 | 172643057664 |
| India | 2036 | 143676 | 0.257 | 177598578688 |
| India | 2037 | 140312 | 0.252 | 183408279552 |
| India | 2038 | 137510 | 0.249 | 190066884608 |
| India | 2039 | 135197 | 0.245 | 197597446144 |
| India | 2040 | 133299 | 0.243 | 205998473216 |
| India | 2041 | 131763 | 0.242 | 215332454400 |
| India | 2042 | 130545 | 0.241 | 225580564480 |
| India | 2043 | 129602 | 0.240 | 236806799360 |
| India | 2044 | 128896 | 0.240 | 249013714944 |
| India | 2045 | 128404 | 0.240 | 262301827072 |
| India | 2046 | 128102 | 0.242 | 276748828672 |
| India | 2047 | 127970 | 0.243 | 292378247168 |
| India | 2048 | 127987 | 0.244 | 309252227072 |
| India | 2049 | 128142 | 0.245 | 327426342912 |
| India | 2050 | 128420 | 0.248 | 346788560896 |

**Vaccination initiated in 2020 to all ages (54.1% efficacy with 10 years of protection)**

| Country Name | Year | TB Deaths | Mean LE at Birth | Full-income Loss |
| --- | --- | --- | --- | --- |
| India | 2020 | 364094 | 0.662 | 183935762432 |
| India | 2021 | 342357 | 0.619 | 182952329216 |
| India | 2022 | 320737 | 0.578 | 181277884416 |
| India | 2023 | 300146 | 0.540 | 179406471168 |
| India | 2024 | 281086 | 0.502 | 177670324224 |
| India | 2025 | 263776 | 0.470 | 176299311104 |
| India | 2026 | 248287 | 0.441 | 175512551424 |
| India | 2027 | 234590 | 0.418 | 175379988480 |
| India | 2028 | 222596 | 0.394 | 175988162560 |
| India | 2029 | 212174 | 0.376 | 177384816640 |
| India | 2030 | 203175 | 0.361 | 179601113088 |
| India | 2031 | 195442 | 0.347 | 182718791680 |
| India | 2032 | 188837 | 0.335 | 186694893568 |
| India | 2033 | 183223 | 0.326 | 191557091328 |
| India | 2034 | 178474 | 0.318 | 197302206464 |
| India | 2035 | 174476 | 0.312 | 203942019072 |
| India | 2036 | 171136 | 0.307 | 211541360640 |
| India | 2037 | 168375 | 0.303 | 220086157312 |
| India | 2038 | 166104 | 0.301 | 229588746240 |
| India | 2039 | 164275 | 0.298 | 240088743936 |
| India | 2040 | 162819 | 0.297 | 251620229120 |
| India | 2041 | 161702 | 0.297 | 264256372736 |
| India | 2042 | 160874 | 0.297 | 277991849984 |
| India | 2043 | 160306 | 0.297 | 292907548672 |
| India | 2044 | 159966 | 0.298 | 309036023808 |
| India | 2045 | 159819 | 0.298 | 326472564736 |
| India | 2046 | 159853 | 0.302 | 345342574592 |
| India | 2047 | 160057 | 0.304 | 365693370368 |
| India | 2048 | 160395 | 0.306 | 387551690752 |
| India | 2049 | 160863 | 0.308 | 411039170560 |
| India | 2050 | 161453 | 0.312 | 435984171008 |

**Section 2: Health and Economic Benefits in Indonesia**


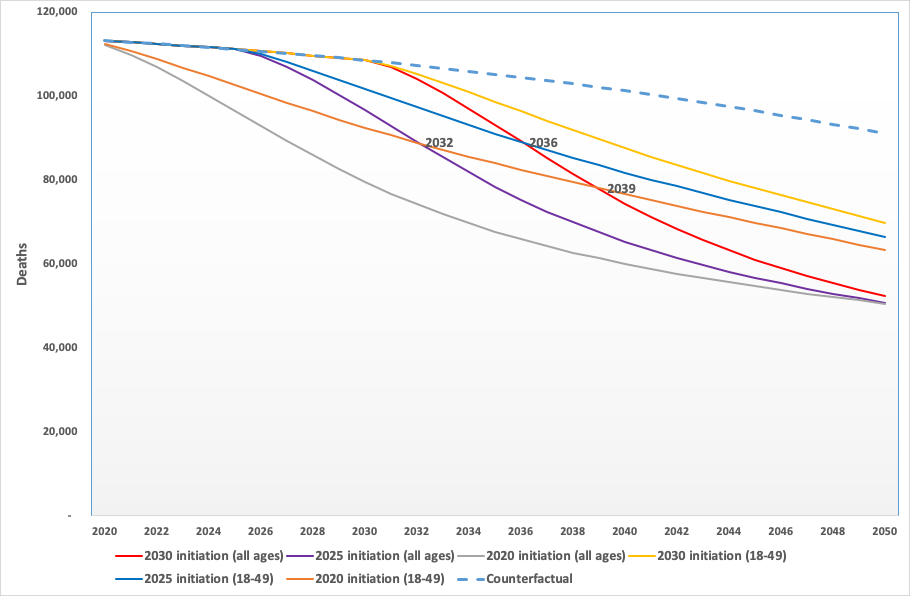


**Appendix Figure 2:** Impact of vaccination initiation and vaccinated age group, on TB mortality in Indonesia between 2020 and 2050. Impact shown for vaccination initiation in 2020, 2025 and 2030, to individuals of all ages or individuals between the ages of 18-49 years, with a vaccine that provides 54.1% efficacy and lifetime protection.

**Status quo scenario**

| Country Name | Year | TB Deaths | Mean LE at Birth | Full-income loss |
| --- | --- | --- | --- | --- |
| Indonesia | 2020 | 113283 | 0.935 | 87988469760 |
| Indonesia | 2021 | 112899 | 0.927 | 91339636736 |
| Indonesia | 2022 | 112502 | 0.918 | 94779629568 |
| Indonesia | 2023 | 112088 | 0.908 | 98316050432 |
| Indonesia | 2024 | 111655 | 0.897 | 101948047360 |
| Indonesia | 2025 | 111204 | 0.887 | 105684770816 |
| Indonesia | 2026 | 110730 | 0.881 | 109651075072 |
| Indonesia | 2027 | 110231 | 0.874 | 113700921344 |
| Indonesia | 2028 | 109707 | 0.864 | 117844131840 |
| Indonesia | 2029 | 109164 | 0.857 | 122071465984 |
| Indonesia | 2030 | 108589 | 0.846 | 126382612480 |
| Indonesia | 2031 | 107989 | 0.841 | 130944573440 |
| Indonesia | 2032 | 107359 | 0.837 | 135578189824 |
| Indonesia | 2033 | 106703 | 0.830 | 140308463616 |
| Indonesia | 2034 | 106016 | 0.823 | 145132748800 |
| Indonesia | 2035 | 105293 | 0.815 | 150037233664 |
| Indonesia | 2036 | 104551 | 0.813 | 155198996480 |
| Indonesia | 2037 | 103777 | 0.807 | 160436027392 |
| Indonesia | 2038 | 102966 | 0.801 | 165754781696 |
| Indonesia | 2039 | 102136 | 0.795 | 171172937728 |
| Indonesia | 2040 | 101264 | 0.788 | 176675209216 |
| Indonesia | 2041 | 100378 | 0.783 | 182463676416 |
| Indonesia | 2042 | 99454 | 0.777 | 188306079744 |
| Indonesia | 2043 | 98509 | 0.770 | 194248392704 |
| Indonesia | 2044 | 97529 | 0.764 | 200239513600 |
| Indonesia | 2045 | 96527 | 0.757 | 206325809152 |
| Indonesia | 2046 | 95498 | 0.750 | 212694827008 |
| Indonesia | 2047 | 94447 | 0.745 | 219116781568 |
| Indonesia | 2048 | 93374 | 0.739 | 225579188224 |
| Indonesia | 2049 | 92279 | 0.731 | 232111865856 |
| Indonesia | 2050 | 91165 | 0.725 | 238730870784 |

**Vaccination initiated in 2030 to all ages (54.1% efficacy with lifelong protection)**

| Country Name | Year | TB Deaths | Mean LE at Birth | Full-income loss |
| --- | --- | --- | --- | --- |
| Indonesia | 2020 | 113283 | 0.935 | 87988469760 |
| Indonesia | 2021 | 112899 | 0.927 | 91339636736 |
| Indonesia | 2022 | 112502 | 0.918 | 94779629568 |
| Indonesia | 2023 | 112088 | 0.908 | 98316050432 |
| Indonesia | 2024 | 111655 | 0.897 | 101948047360 |
| Indonesia | 2025 | 111204 | 0.887 | 105684770816 |
| Indonesia | 2026 | 110730 | 0.881 | 109651075072 |
| Indonesia | 2027 | 110231 | 0.874 | 113700921344 |
| Indonesia | 2028 | 109707 | 0.864 | 117844131840 |
| Indonesia | 2029 | 109164 | 0.857 | 122071465984 |
| Indonesia | 2030 | 108589 | 0.846 | 126382612480 |
| Indonesia | 2031 | 106877 | 0.832 | 129594540032 |
| Indonesia | 2032 | 104067 | 0.811 | 131421282304 |
| Indonesia | 2033 | 100724 | 0.783 | 132449697792 |
| Indonesia | 2034 | 97042 | 0.752 | 132843020288 |
| Indonesia | 2035 | 93179 | 0.720 | 132776271872 |
| Indonesia | 2036 | 89245 | 0.693 | 132477255680 |
| Indonesia | 2037 | 85343 | 0.662 | 131936968704 |
| Indonesia | 2038 | 81544 | 0.633 | 131269992448 |
| Indonesia | 2039 | 77891 | 0.605 | 130544689152 |
| Indonesia | 2040 | 74426 | 0.578 | 129855504384 |
| Indonesia | 2041 | 71242 | 0.554 | 129507024896 |
| Indonesia | 2042 | 68352 | 0.533 | 129424949248 |
| Indonesia | 2043 | 65710 | 0.512 | 129579802624 |
| Indonesia | 2044 | 63289 | 0.494 | 129943805952 |
| Indonesia | 2045 | 61078 | 0.478 | 130554339328 |
| Indonesia | 2046 | 59047 | 0.462 | 131513180160 |
| Indonesia | 2047 | 57183 | 0.450 | 132664762368 |
| Indonesia | 2048 | 55466 | 0.438 | 134003097600 |
| Indonesia | 2049 | 53879 | 0.426 | 135526612992 |
| Indonesia | 2050 | 52414 | 0.416 | 137269608448 |

**Vaccination initiated in 2025 to all ages (54.1% efficacy with lifelong protection)**

| Country Name | Year | TB Deaths | Mean LE at Birth | Full-income loss |
| --- | --- | --- | --- | --- |
| Indonesia | 2020 | 113283 | 0.935 | 87988469760 |
| Indonesia | 2021 | 112899 | 0.927 | 91339636736 |
| Indonesia | 2022 | 112502 | 0.918 | 94779629568 |
| Indonesia | 2023 | 112088 | 0.908 | 98316050432 |
| Indonesia | 2024 | 111655 | 0.897 | 101948047360 |
| Indonesia | 2025 | 111204 | 0.887 | 105684770816 |
| Indonesia | 2026 | 109647 | 0.872 | 108574597120 |
| Indonesia | 2027 | 107016 | 0.848 | 110385111040 |
| Indonesia | 2028 | 103858 | 0.818 | 111557672960 |
| Indonesia | 2029 | 100355 | 0.787 | 112219455488 |
| Indonesia | 2030 | 96652 | 0.752 | 112492994560 |
| Indonesia | 2031 | 92878 | 0.722 | 112616464384 |
| Indonesia | 2032 | 89102 | 0.693 | 112523870208 |
| Indonesia | 2033 | 85418 | 0.663 | 112323428352 |
| Indonesia | 2034 | 81856 | 0.633 | 112057516032 |
| Indonesia | 2035 | 78474 | 0.606 | 111828271104 |
| Indonesia | 2036 | 75357 | 0.584 | 111864528896 |
| Indonesia | 2037 | 72519 | 0.562 | 112117407744 |
| Indonesia | 2038 | 69923 | 0.542 | 112561192960 |
| Indonesia | 2039 | 67537 | 0.524 | 113192697856 |
| Indonesia | 2040 | 65355 | 0.507 | 114024570880 |
| Indonesia | 2041 | 63343 | 0.492 | 115147603968 |
| Indonesia | 2042 | 61503 | 0.479 | 116458250240 |
| Indonesia | 2043 | 59805 | 0.466 | 117924814848 |
| Indonesia | 2044 | 58232 | 0.455 | 119563075584 |
| Indonesia | 2045 | 56778 | 0.444 | 121368141824 |
| Indonesia | 2046 | 55428 | 0.434 | 123456307200 |
| Indonesia | 2047 | 54165 | 0.426 | 125668188160 |
| Indonesia | 2048 | 52981 | 0.418 | 128002105344 |
| Indonesia | 2049 | 51871 | 0.410 | 130475368448 |
| Indonesia | 2050 | 50820 | 0.403 | 133093638144 |

**Vaccination initiated in 2020 to all ages (54.1% efficacy with lifelong protection)**

| Country Name | Year | TB Deaths | Mean LE at Birth | Full-income loss |
| --- | --- | --- | --- | --- |
| Indonesia | 2020 | 112247 | 0.926 | 87181279232 |
| Indonesia | 2021 | 109808 | 0.901 | 88838733824 |
| Indonesia | 2022 | 106850 | 0.871 | 90019282944 |
| Indonesia | 2023 | 103560 | 0.838 | 90834812928 |
| Indonesia | 2024 | 100063 | 0.803 | 91363524608 |
| Indonesia | 2025 | 96479 | 0.768 | 91689189376 |
| Indonesia | 2026 | 92892 | 0.737 | 91984846848 |
| Indonesia | 2027 | 89370 | 0.707 | 92181118976 |
| Indonesia | 2028 | 85962 | 0.675 | 92337979392 |
| Indonesia | 2029 | 82703 | 0.648 | 92483026944 |
| Indonesia | 2030 | 79624 | 0.619 | 92671934464 |
| Indonesia | 2031 | 76786 | 0.596 | 93109223424 |
| Indonesia | 2032 | 74217 | 0.577 | 93730054144 |
| Indonesia | 2033 | 71859 | 0.558 | 94495924224 |
| Indonesia | 2034 | 69705 | 0.539 | 95427551232 |
| Indonesia | 2035 | 67740 | 0.522 | 96529793024 |
| Indonesia | 2036 | 65935 | 0.511 | 97879719936 |
| Indonesia | 2037 | 64281 | 0.498 | 99381854208 |
| Indonesia | 2038 | 62755 | 0.486 | 101024407552 |
| Indonesia | 2039 | 61353 | 0.476 | 102821707776 |
| Indonesia | 2040 | 60051 | 0.466 | 104768659456 |
| Indonesia | 2041 | 58844 | 0.457 | 106968760320 |
| Indonesia | 2042 | 57714 | 0.449 | 109284179968 |
| Indonesia | 2043 | 56656 | 0.441 | 111724838912 |
| Indonesia | 2044 | 55663 | 0.434 | 114288664576 |
| Indonesia | 2045 | 54724 | 0.428 | 116974673920 |
| Indonesia | 2046 | 53830 | 0.421 | 119898087424 |
| Indonesia | 2047 | 52979 | 0.416 | 122913792000 |
| Indonesia | 2048 | 52157 | 0.411 | 126007844864 |
| Indonesia | 2049 | 51367 | 0.406 | 129203625984 |
| Indonesia | 2050 | 50602 | 0.401 | 132519264256 |

**Vaccination initiated in 2030 to ages 18-49 (54.1% efficacy with lifelong protection)**

| Country Name | Year | TB Deaths | Mean LE at Birth | Full-income loss |
| --- | --- | --- | --- | --- |
| Indonesia | 2020 | 113283 | 0.935 | 87988469760 |
| Indonesia | 2021 | 112899 | 0.927 | 91339636736 |
| Indonesia | 2022 | 112502 | 0.918 | 94779629568 |
| Indonesia | 2023 | 112088 | 0.908 | 98316050432 |
| Indonesia | 2024 | 111655 | 0.897 | 101948047360 |
| Indonesia | 2025 | 111204 | 0.887 | 105684770816 |
| Indonesia | 2026 | 110730 | 0.881 | 109651075072 |
| Indonesia | 2027 | 110231 | 0.874 | 113700921344 |
| Indonesia | 2028 | 109707 | 0.864 | 117844131840 |
| Indonesia | 2029 | 109164 | 0.857 | 122071465984 |
| Indonesia | 2030 | 108589 | 0.846 | 126382612480 |
| Indonesia | 2031 | 107262 | 0.835 | 130065178624 |
| Indonesia | 2032 | 105335 | 0.821 | 133027012608 |
| Indonesia | 2033 | 103197 | 0.803 | 135697678336 |
| Indonesia | 2034 | 100952 | 0.783 | 138198581248 |
| Indonesia | 2035 | 98658 | 0.763 | 140585746432 |
| Indonesia | 2036 | 96363 | 0.749 | 143046885376 |
| Indonesia | 2037 | 94099 | 0.731 | 145471881216 |
| Indonesia | 2038 | 91876 | 0.714 | 147901317120 |
| Indonesia | 2039 | 89707 | 0.697 | 150345269248 |
| Indonesia | 2040 | 87595 | 0.681 | 152826855424 |
| Indonesia | 2041 | 85564 | 0.666 | 155544272896 |
| Indonesia | 2042 | 83606 | 0.652 | 158306615296 |
| Indonesia | 2043 | 81720 | 0.638 | 161146781696 |
| Indonesia | 2044 | 79885 | 0.625 | 164019716096 |
| Indonesia | 2045 | 78105 | 0.611 | 166954254336 |
| Indonesia | 2046 | 76381 | 0.599 | 170123329536 |
| Indonesia | 2047 | 74697 | 0.588 | 173293404160 |
| Indonesia | 2048 | 73049 | 0.577 | 176483123200 |
| Indonesia | 2049 | 71449 | 0.565 | 179721650176 |
| Indonesia | 2050 | 69871 | 0.555 | 182985113600 |

**Vaccination initiated in 2025 to ages 18-49 (54.1% efficacy with lifelong protection)**

| Country Name | Year | TB Deaths | Mean LE at Birth | Full-income loss |
| --- | --- | --- | --- | --- |
| Indonesia | 2020 | 113283 | 0.935 | 87988469760 |
| Indonesia | 2021 | 112899 | 0.927 | 91339636736 |
| Indonesia | 2022 | 112502 | 0.918 | 94779629568 |
| Indonesia | 2023 | 112088 | 0.908 | 98316050432 |
| Indonesia | 2024 | 111655 | 0.897 | 101948047360 |
| Indonesia | 2025 | 111204 | 0.887 | 105684770816 |
| Indonesia | 2026 | 109989 | 0.875 | 108915515392 |
| Indonesia | 2027 | 108170 | 0.857 | 111569936384 |
| Indonesia | 2028 | 106130 | 0.836 | 113997225984 |
| Indonesia | 2029 | 103976 | 0.816 | 116269727744 |
| Indonesia | 2030 | 101773 | 0.792 | 118450307072 |
| Indonesia | 2031 | 99554 | 0.774 | 120717901824 |
| Indonesia | 2032 | 97361 | 0.758 | 122950033408 |
| Indonesia | 2033 | 95202 | 0.740 | 125187424256 |
| Indonesia | 2034 | 93094 | 0.721 | 127441731584 |
| Indonesia | 2035 | 91047 | 0.704 | 129735860224 |
| Indonesia | 2036 | 89074 | 0.692 | 132231577600 |
| Indonesia | 2037 | 87175 | 0.677 | 134770565120 |
| Indonesia | 2038 | 85337 | 0.663 | 137371910144 |
| Indonesia | 2039 | 83556 | 0.649 | 140038062080 |
| Indonesia | 2040 | 81829 | 0.636 | 142760181760 |
| Indonesia | 2041 | 80154 | 0.624 | 145701191680 |
| Indonesia | 2042 | 78511 | 0.612 | 148661125120 |
| Indonesia | 2043 | 76915 | 0.600 | 151671209984 |
| Indonesia | 2044 | 75357 | 0.589 | 154720223232 |
| Indonesia | 2045 | 73821 | 0.578 | 157796171776 |
| Indonesia | 2046 | 72324 | 0.567 | 161078771712 |
| Indonesia | 2047 | 70846 | 0.558 | 164367400960 |
| Indonesia | 2048 | 69395 | 0.548 | 167649918976 |
| Indonesia | 2049 | 67966 | 0.537 | 170954964992 |
| Indonesia | 2050 | 66548 | 0.528 | 174274658304 |

**Vaccination initiated in 2020 to ages 18-49 (54.1% efficacy with lifelong protection)**

| Country Name | Year | TB Deaths | Mean LE at Birth | Full-income loss |
| --- | --- | --- | --- | --- |
| Indonesia | 2020 | 112545 | 0.929 | 87415218176 |
| Indonesia | 2021 | 110827 | 0.910 | 89664053248 |
| Indonesia | 2022 | 108887 | 0.888 | 91736219648 |
| Indonesia | 2023 | 106839 | 0.865 | 93714325504 |
| Indonesia | 2024 | 104730 | 0.840 | 95627509760 |
| Indonesia | 2025 | 102612 | 0.818 | 97520828416 |
| Indonesia | 2026 | 100508 | 0.799 | 99524829184 |
| Indonesia | 2027 | 98440 | 0.779 | 101536874496 |
| Indonesia | 2028 | 96418 | 0.758 | 103571226624 |
| Indonesia | 2029 | 94453 | 0.740 | 105622413312 |
| Indonesia | 2030 | 92554 | 0.720 | 107720237056 |
| Indonesia | 2031 | 90724 | 0.705 | 110006747136 |
| Indonesia | 2032 | 88972 | 0.692 | 112359907328 |
| Indonesia | 2033 | 87269 | 0.678 | 114756435968 |
| Indonesia | 2034 | 85629 | 0.663 | 117222662144 |
| Indonesia | 2035 | 84034 | 0.649 | 119743561728 |
| Indonesia | 2036 | 82486 | 0.640 | 122447904768 |
| Indonesia | 2037 | 80978 | 0.628 | 125186924544 |
| Indonesia | 2038 | 79502 | 0.617 | 127978684416 |
| Indonesia | 2039 | 78053 | 0.606 | 130818654208 |
| Indonesia | 2040 | 76631 | 0.595 | 133699051520 |
| Indonesia | 2041 | 75237 | 0.585 | 136764358656 |
| Indonesia | 2042 | 73865 | 0.576 | 139867701248 |
| Indonesia | 2043 | 72506 | 0.566 | 142976745472 |
| Indonesia | 2044 | 71165 | 0.556 | 146117558272 |
| Indonesia | 2045 | 69842 | 0.546 | 149285814272 |
| Indonesia | 2046 | 68523 | 0.537 | 152623136768 |
| Indonesia | 2047 | 67220 | 0.529 | 155954561024 |
| Indonesia | 2048 | 65927 | 0.521 | 159271534592 |
| Indonesia | 2049 | 64641 | 0.511 | 162592899072 |
| Indonesia | 2050 | 63367 | 0.503 | 165943017472 |

**Vaccination initiated in 2020 to ages 18-49 (49.7% efficacy with lifelong protection)**

| Country Name | Year | TB Deaths | Mean LE at Birth | Full-income loss |
| --- | --- | --- | --- | --- |
| Indonesia | 2020 | 112602 | 0.929 | 87461699584 |
| Indonesia | 2021 | 110995 | 0.911 | 89801179136 |
| Indonesia | 2022 | 109174 | 0.891 | 91977146368 |
| Indonesia | 2023 | 107249 | 0.868 | 94074445824 |
| Indonesia | 2024 | 105274 | 0.845 | 96119390208 |
| Indonesia | 2025 | 103274 | 0.823 | 98145525760 |
| Indonesia | 2026 | 101283 | 0.805 | 100292190208 |
| Indonesia | 2027 | 99328 | 0.786 | 102451888128 |
| Indonesia | 2028 | 97413 | 0.766 | 104634556416 |
| Indonesia | 2029 | 95552 | 0.749 | 106852655104 |
| Indonesia | 2030 | 93740 | 0.729 | 109099638784 |
| Indonesia | 2031 | 91994 | 0.715 | 111546892288 |
| Indonesia | 2032 | 90320 | 0.703 | 114061410304 |
| Indonesia | 2033 | 88690 | 0.689 | 116623892480 |
| Indonesia | 2034 | 87111 | 0.675 | 119254048768 |
| Indonesia | 2035 | 85581 | 0.661 | 121947807744 |
| Indonesia | 2036 | 84088 | 0.653 | 124826501120 |
| Indonesia | 2037 | 82626 | 0.641 | 127739953152 |
| Indonesia | 2038 | 81198 | 0.630 | 130715836416 |
| Indonesia | 2039 | 79797 | 0.620 | 133740527616 |
| Indonesia | 2040 | 78411 | 0.609 | 136801329152 |
| Indonesia | 2041 | 77059 | 0.599 | 140075958272 |
| Indonesia | 2042 | 75712 | 0.590 | 143357247488 |
| Indonesia | 2043 | 74383 | 0.580 | 146680070144 |
| Indonesia | 2044 | 73070 | 0.571 | 150024110080 |
| Indonesia | 2045 | 71768 | 0.562 | 153407422464 |
| Indonesia | 2046 | 70469 | 0.552 | 156951756800 |
| Indonesia | 2047 | 69187 | 0.545 | 160508985344 |
| Indonesia | 2048 | 67909 | 0.536 | 164070424576 |
| Indonesia | 2049 | 66639 | 0.527 | 167621951488 |
| Indonesia | 2050 | 65374 | 0.519 | 171201904640 |

**Vaccination initiated in 2020 to ages 18-49 (54.1% efficacy with 10 years of protection)**

| Country Name | Year | TB Deaths | Mean LE at Birth | Full-income loss |
| --- | --- | --- | --- | --- |
| Indonesia | 2020 | 112624 | 0.930 | 87476207616 |
| Indonesia | 2021 | 111113 | 0.912 | 89895755776 |
| Indonesia | 2022 | 109463 | 0.893 | 92220940288 |
| Indonesia | 2023 | 107773 | 0.873 | 94534074368 |
| Indonesia | 2024 | 106067 | 0.851 | 96847839232 |
| Indonesia | 2025 | 104382 | 0.832 | 99198672896 |
| Indonesia | 2026 | 102736 | 0.816 | 101734572032 |
| Indonesia | 2027 | 101149 | 0.801 | 104335581184 |
| Indonesia | 2028 | 99624 | 0.784 | 107010793472 |
| Indonesia | 2029 | 98154 | 0.769 | 109760004096 |
| Indonesia | 2030 | 96757 | 0.753 | 112612491264 |
| Indonesia | 2031 | 95415 | 0.742 | 115696001024 |
| Indonesia | 2032 | 94130 | 0.733 | 118878609408 |
| Indonesia | 2033 | 92904 | 0.722 | 122169008128 |
| Indonesia | 2034 | 91736 | 0.711 | 125580795904 |
| Indonesia | 2035 | 90610 | 0.700 | 129113923584 |
| Indonesia | 2036 | 89533 | 0.695 | 132906352640 |
| Indonesia | 2037 | 88488 | 0.687 | 136797831168 |
| Indonesia | 2038 | 87479 | 0.680 | 140824002560 |
| Indonesia | 2039 | 86505 | 0.672 | 144985767936 |
| Indonesia | 2040 | 85562 | 0.665 | 149281390592 |
| Indonesia | 2041 | 84643 | 0.659 | 153860947968 |
| Indonesia | 2042 | 83736 | 0.653 | 158552571904 |
| Indonesia | 2043 | 82848 | 0.647 | 163363962880 |
| Indonesia | 2044 | 81972 | 0.641 | 168307818496 |
| Indonesia | 2045 | 81109 | 0.635 | 173368573952 |
| Indonesia | 2046 | 80254 | 0.630 | 178745966592 |
| Indonesia | 2047 | 79397 | 0.626 | 184197955584 |
| Indonesia | 2048 | 78546 | 0.621 | 189761847296 |
| Indonesia | 2049 | 77697 | 0.615 | 195438624768 |
| Indonesia | 2050 | 76844 | 0.611 | 201243115520 |

**Vaccination initiated in 2020 to ages 18-49 (54.1% efficacy with lifelong protection)**

| Country Name | Year | TB Deaths | Mean LE at Birth | Full-income loss |
| --- | --- | --- | --- | --- |
| Indonesia | 2020 | 112545 | 0.929 | 87415218176 |
| Indonesia | 2021 | 110824 | 0.909 | 89660096512 |
| Indonesia | 2022 | 108885 | 0.888 | 91733893120 |
| Indonesia | 2023 | 106839 | 0.865 | 93714325504 |
| Indonesia | 2024 | 104730 | 0.840 | 95627509760 |
| Indonesia | 2025 | 102612 | 0.818 | 97520828416 |
| Indonesia | 2026 | 100508 | 0.799 | 99524829184 |
| Indonesia | 2027 | 98440 | 0.779 | 101536874496 |
| Indonesia | 2028 | 96418 | 0.758 | 103571226624 |
| Indonesia | 2029 | 94455 | 0.740 | 105625706496 |
| Indonesia | 2030 | 92551 | 0.720 | 107715649536 |
| Indonesia | 2031 | 90724 | 0.705 | 110006747136 |
| Indonesia | 2032 | 88972 | 0.692 | 112359907328 |
| Indonesia | 2033 | 87269 | 0.678 | 114756435968 |
| Indonesia | 2034 | 85629 | 0.663 | 117222662144 |
| Indonesia | 2035 | 84038 | 0.649 | 119749435392 |
| Indonesia | 2036 | 82486 | 0.640 | 122447904768 |
| Indonesia | 2037 | 80978 | 0.628 | 125186924544 |
| Indonesia | 2038 | 79502 | 0.617 | 127978684416 |
| Indonesia | 2039 | 78053 | 0.606 | 130818654208 |
| Indonesia | 2040 | 76633 | 0.595 | 133703114752 |
| Indonesia | 2041 | 75237 | 0.585 | 136764358656 |
| Indonesia | 2042 | 73865 | 0.576 | 139867701248 |
| Indonesia | 2043 | 72506 | 0.566 | 142976745472 |
| Indonesia | 2044 | 71165 | 0.556 | 146117558272 |
| Indonesia | 2045 | 69842 | 0.546 | 149285814272 |
| Indonesia | 2046 | 68523 | 0.537 | 152623136768 |
| Indonesia | 2047 | 67218 | 0.529 | 155951923200 |
| Indonesia | 2048 | 65927 | 0.521 | 159271534592 |
| Indonesia | 2049 | 64641 | 0.511 | 162592899072 |
| Indonesia | 2050 | 63367 | 0.503 | 165943017472 |

**Vaccination initiated in 2020 to ages 18-49 (54.1% efficacy with 10 years of protection)**

| Country Name | Year | TB Deaths | Mean LE at Birth | Full-income loss |
| --- | --- | --- | --- | --- |
| Indonesia | 2020 | 112564 | 0.929 | 87432232960 |
| Indonesia | 2021 | 110956 | 0.911 | 89769713664 |
| Indonesia | 2022 | 109202 | 0.891 | 92000862208 |
| Indonesia | 2023 | 107402 | 0.870 | 94205943808 |
| Indonesia | 2024 | 105591 | 0.847 | 96413818880 |
| Indonesia | 2025 | 103817 | 0.827 | 98663489536 |
| Indonesia | 2026 | 102078 | 0.811 | 101081956352 |
| Indonesia | 2027 | 100405 | 0.795 | 103564582912 |
| Indonesia | 2028 | 98800 | 0.777 | 106124640256 |
| Indonesia | 2029 | 97264 | 0.762 | 108764479488 |
| Indonesia | 2030 | 95800 | 0.745 | 111500541952 |
| Indonesia | 2031 | 94407 | 0.734 | 114475196416 |
| Indonesia | 2032 | 93079 | 0.724 | 117544714240 |
| Indonesia | 2033 | 91807 | 0.713 | 120726609920 |
| Indonesia | 2034 | 90600 | 0.702 | 124027076608 |
| Indonesia | 2035 | 89444 | 0.691 | 127457075200 |
| Indonesia | 2036 | 88336 | 0.686 | 131131908096 |
| Indonesia | 2037 | 87277 | 0.678 | 134929408000 |
| Indonesia | 2038 | 86260 | 0.670 | 138865950720 |
| Indonesia | 2039 | 85274 | 0.662 | 142917337088 |
| Indonesia | 2040 | 84324 | 0.655 | 147113836544 |
| Indonesia | 2041 | 83396 | 0.649 | 151596564480 |
| Indonesia | 2042 | 82494 | 0.644 | 156199714816 |
| Indonesia | 2043 | 81608 | 0.637 | 160927219712 |
| Indonesia | 2044 | 80742 | 0.631 | 165778505728 |
| Indonesia | 2045 | 79890 | 0.625 | 170766106624 |
| Indonesia | 2046 | 79041 | 0.620 | 176048291840 |
| Indonesia | 2047 | 78210 | 0.616 | 181444657152 |
| Indonesia | 2048 | 77372 | 0.611 | 186930069504 |
| Indonesia | 2049 | 76544 | 0.606 | 192536395776 |
| Indonesia | 2050 | 75714 | 0.601 | 198271942656 |

**Vaccination initiated in 2020 to all ages (49.7% efficacy with lifelong protection)**

| Country Name | Year | TB Deaths | Mean LE at Birth | Full-income loss |
| --- | --- | --- | --- | --- |
| Indonesia | 2020 | 112332 | 0.927 | 87248904192 |
| Indonesia | 2021 | 110054 | 0.903 | 89038168064 |
| Indonesia | 2022 | 107297 | 0.875 | 90396557312 |
| Indonesia | 2023 | 104220 | 0.843 | 91414609920 |
| Indonesia | 2024 | 100945 | 0.810 | 92172771328 |
| Indonesia | 2025 | 97581 | 0.777 | 92737290240 |
| Indonesia | 2026 | 94207 | 0.748 | 93288669184 |
| Indonesia | 2027 | 90893 | 0.719 | 93752500224 |
| Indonesia | 2028 | 87682 | 0.689 | 94185594880 |
| Indonesia | 2029 | 84607 | 0.663 | 94609047552 |
| Indonesia | 2030 | 81687 | 0.635 | 95074803712 |
| Indonesia | 2031 | 78999 | 0.613 | 95795658752 |
| Indonesia | 2032 | 76556 | 0.595 | 96682287104 |
| Indonesia | 2033 | 74312 | 0.577 | 97721081856 |
| Indonesia | 2034 | 72260 | 0.559 | 98920996864 |
| Indonesia | 2035 | 70376 | 0.543 | 100283375616 |
| Indonesia | 2036 | 68645 | 0.532 | 101907234816 |
| Indonesia | 2037 | 67051 | 0.519 | 103661780992 |
| Indonesia | 2038 | 65584 | 0.508 | 105581330432 |
| Indonesia | 2039 | 64227 | 0.498 | 107644018688 |
| Indonesia | 2040 | 62964 | 0.488 | 109854343168 |
| Indonesia | 2041 | 61790 | 0.480 | 112326688768 |
| Indonesia | 2042 | 60687 | 0.473 | 114912018432 |
| Indonesia | 2043 | 59650 | 0.465 | 117622972416 |
| Indonesia | 2044 | 58670 | 0.458 | 120460460032 |
| Indonesia | 2045 | 57734 | 0.451 | 123403616256 |
| Indonesia | 2046 | 56842 | 0.445 | 126599233536 |
| Indonesia | 2047 | 55991 | 0.440 | 129901494272 |
| Indonesia | 2048 | 55167 | 0.435 | 133276196864 |
| Indonesia | 2049 | 54366 | 0.429 | 136753840128 |
| Indonesia | 2050 | 53588 | 0.425 | 140340461568 |

**Vaccination initiated in 2020 to all ages (49.7% efficacy with 10 years of protection)**

| Country Name | Year | TB Deaths | Mean LE at Birth | Full-income loss |
| --- | --- | --- | --- | --- |
| Indonesia | 2020 | 112355 | 0.927 | 87268941824 | |
| Indonesia | 2021 | 110237 | 0.905 | 89189302272 | |
| Indonesia | 2022 | 107773 | 0.879 | 90796294144 | |
| Indonesia | 2023 | 105115 | 0.851 | 92200812544 | |
| Indonesia | 2024 | 102378 | 0.821 | 93476454400 | |
| Indonesia | 2025 | 99635 | 0.794 | 94692212736 | |
| Indonesia | 2026 | 96953 | 0.770 | 96004005888 | |
| Indonesia | 2027 | 94366 | 0.747 | 97336795136 | |
| Indonesia | 2028 | 91904 | 0.723 | 98718539776 | |
| Indonesia | 2029 | 89566 | 0.702 | 100157620224 | |
| Indonesia | 2030 | 87378 | 0.679 | 101695627264 | |
| Indonesia | 2031 | 85324 | 0.663 | 103464157184 | |
| Indonesia | 2032 | 83418 | 0.649 | 105344278528 | |
| Indonesia | 2033 | 81630 | 0.634 | 107340439552 | |
| Indonesia | 2034 | 79968 | 0.619 | 109474136064 | |
| Indonesia | 2035 | 78419 | 0.605 | 111743983616 | |
| Indonesia | 2036 | 76962 | 0.597 | 114249580544 | |
| Indonesia | 2037 | 75612 | 0.586 | 116896686080 | |
| Indonesia | 2038 | 74337 | 0.577 | 119667851264 | |
| Indonesia | 2039 | 73144 | 0.568 | 122583228416 | |
| Indonesia | 2040 | 72012 | 0.559 | 125641408512 | |
| Indonesia | 2041 | 70941 | 0.552 | 128955097088 | |
| Indonesia | 2042 | 69918 | 0.545 | 132383875072 | |
| Indonesia | 2043 | 68939 | 0.537 | 135935631360 | |
| Indonesia | 2044 | 67991 | 0.531 | 139601264640 | |
| Indonesia | 2045 | 67084 | 0.525 | 143394242560 | |
| Indonesia | 2046 | 66196 | 0.519 | 147442171904 | |
| Indonesia | 2047 | 65334 | 0.514 | 151578017792 | |
| Indonesia | 2048 | 64484 | 0.509 | 155792588800 | |
| Indonesia | 2049 | 63651 | 0.503 | 160102318080 | |
| Indonesia | 2050 | 62828 | 0.499 | 164529160192 | |

**Vaccination initiated in 2020 to all ages (54.1% efficacy with lifelong protection)**

| Country Name | Year | TB Deaths | Mean LE at Birth | Full-income loss |
| --- | --- | --- | --- | --- |
| Indonesia | 2020 | 112247 | 0.926 | 87181279232 |
| Indonesia | 2021 | 109808 | 0.901 | 88838733824 |
| Indonesia | 2022 | 106850 | 0.871 | 90019282944 |
| Indonesia | 2023 | 103560 | 0.838 | 90834812928 |
| Indonesia | 2024 | 100065 | 0.803 | 91365752832 |
| Indonesia | 2025 | 96479 | 0.768 | 91689189376 |
| Indonesia | 2026 | 92892 | 0.737 | 91984846848 |
| Indonesia | 2027 | 89370 | 0.707 | 92181118976 |
| Indonesia | 2028 | 85962 | 0.675 | 92337979392 |
| Indonesia | 2029 | 82703 | 0.648 | 92483026944 |
| Indonesia | 2030 | 79624 | 0.619 | 92671934464 |
| Indonesia | 2031 | 76786 | 0.596 | 93109223424 |
| Indonesia | 2032 | 74217 | 0.577 | 93730054144 |
| Indonesia | 2033 | 71859 | 0.558 | 94495924224 |
| Indonesia | 2034 | 69705 | 0.539 | 95427551232 |
| Indonesia | 2035 | 67740 | 0.522 | 96529793024 |
| Indonesia | 2036 | 65935 | 0.511 | 97879719936 |
| Indonesia | 2037 | 64281 | 0.498 | 99381854208 |
| Indonesia | 2038 | 62755 | 0.486 | 101024407552 |
| Indonesia | 2039 | 61353 | 0.476 | 102821707776 |
| Indonesia | 2040 | 60051 | 0.466 | 104768659456 |
| Indonesia | 2041 | 58846 | 0.457 | 106973618176 |
| Indonesia | 2042 | 57712 | 0.449 | 109280714752 |
| Indonesia | 2043 | 56656 | 0.441 | 111724838912 |
| Indonesia | 2044 | 55663 | 0.434 | 114288664576 |
| Indonesia | 2045 | 54724 | 0.428 | 116974673920 |
| Indonesia | 2046 | 53830 | 0.421 | 119898087424 |
| Indonesia | 2047 | 52979 | 0.416 | 122913792000 |
| Indonesia | 2048 | 52157 | 0.411 | 126007844864 |
| Indonesia | 2049 | 51368 | 0.406 | 129208500224 |
| Indonesia | 2050 | 50602 | 0.401 | 132519264256 |

**Vaccination initiated in 2020 to all ages (54.1% efficacy with 10 years of protection)**

| Country Name | Year | TB Deaths | Mean LE at Birth | Full-income loss |
| --- | --- | --- | --- | --- |
| Indonesia | 2020 | 112277 | 0.927 | 87208542208 |
| Indonesia | 2021 | 110011 | 0.903 | 89003663360 |
| Indonesia | 2022 | 107367 | 0.876 | 90454376448 |
| Indonesia | 2023 | 104527 | 0.846 | 91688239104 |
| Indonesia | 2024 | 101612 | 0.815 | 92777676800 |
| Indonesia | 2025 | 98696 | 0.786 | 93798481920 |
| Indonesia | 2026 | 95854 | 0.761 | 94915911680 |
| Indonesia | 2027 | 93111 | 0.737 | 96042336256 |
| Indonesia | 2028 | 90502 | 0.711 | 97216200704 |
| Indonesia | 2029 | 88043 | 0.690 | 98455207936 |
| Indonesia | 2030 | 85745 | 0.667 | 99796574208 |
| Indonesia | 2031 | 83587 | 0.649 | 101353873408 |
| Indonesia | 2032 | 81583 | 0.634 | 103026991104 |
| Indonesia | 2033 | 79718 | 0.619 | 104827682816 |
| Indonesia | 2034 | 77982 | 0.603 | 106757029888 |
| Indonesia | 2035 | 76374 | 0.589 | 108828622848 |
| Indonesia | 2036 | 74871 | 0.581 | 111143526400 |
| Indonesia | 2037 | 73473 | 0.570 | 113585340416 |
| Indonesia | 2038 | 72167 | 0.560 | 116171595776 |
| Indonesia | 2039 | 70941 | 0.550 | 118892314624 |
| Indonesia | 2040 | 69782 | 0.542 | 121748881408 |
| Indonesia | 2041 | 68697 | 0.534 | 124872654848 |
| Indonesia | 2042 | 67659 | 0.527 | 128111124480 |
| Indonesia | 2043 | 66672 | 0.520 | 131469795328 |
| Indonesia | 2044 | 65728 | 0.513 | 134949740544 |
| Indonesia | 2045 | 64824 | 0.507 | 138558406656 |
| Indonesia | 2046 | 63940 | 0.501 | 142415937536 |
| Indonesia | 2047 | 63086 | 0.496 | 146361516032 |
| Indonesia | 2048 | 62254 | 0.491 | 150393618432 |
| Indonesia | 2049 | 61426 | 0.486 | 154509426688 |
| Indonesia | 2050 | 60627 | 0.481 | 158767808512 |
